# Supplementary material for: Lack of Linkages among Fruiting Depth, Weight, and Maturity in Irrigated Truffle Fungi Marks the Complexity of Relationships among Morphogenetic Stages
Source: MDPI journal article supplement (doi:10.3390/jof7020102), 2021-02-01
Supplement: s1 [file s1]

## **Supplementary material**

### **Lack of linkages among fruiting depth, weight, and maturity in irrigated truffle fungi marks the complexity of relationships among morphogenetic stages**

Sergi Garcia-Barreda, Sergio Sánchez, Pedro Marco, Gian Maria Niccolò Benucci, Vicente González

**Table S1** Physicochemical properties of bulk soil in the three blocks of the study site

**Table S2** Number of single fruitbodies sampled, according to harvesting date

**Table S3** Number of fruitbody clusters sampled, according to harvesting date

**Table S4** Categories defined for the estimation of fruitbody shape index

**Table S5** Loadings of the PLS regression to predict fruitbody weight

**Fig. S1** Actual weight vs. weight predicted by the PLS regression

**Fig. S2** Path models tested for single fruitbodies

**Fig. S3** Path models tested for fruitbody clusters

**Fig. S4** Predicted relations among characters in single fruitbodies in the substrate

**Fig. S5** Predicted relations among characters in single fruitbodies in the bulk soil of block 1

**Fig. S6** Predicted relations among characters in single fruitbodies in the bulk soil of block 2

**Fig. S7** Predicted relations among characters in single fruitbodies in the bulk soil of block 3

**Fig. S8** Predicted relations among characters in fruitbody clusters in the substrate

**Fig. S9** Predicted relations among characters in fruitbody clusters in the bulk soil of block 1

**Fig. S10** Predicted relations among characters in fruitbody clusters in the bulk soil of block 2

**Fig. S11** Predicted relations among characters in fruitbody clusters in the bulk soil of block 3

**Table S6** Descriptive statistics for the characters of single fruitbodies

**Table S7** Descriptive statistics for the characters of fruitbody clusters

**Table S1** Soil physiochemical properties of the bulk soil from the three blocks (BS1, BS2, and BS3) in the study site. Soils were analysed at the *Laboratorio Agroambiental* (Government of Aragón).

|                                                              | BS1  | BS2  | BS3  |
|--------------------------------------------------------------|------|------|------|
| Sand (%)                                                     | 54.1 | 46.4 | 31.7 |
| Silt (%)                                                     | 27.3 | 34.5 | 44.4 |
| Clay (%)                                                     | 18.6 | 19.1 | 23.9 |
| pH, in water 1:2.5                                           | 8.3  | 8.5  | 8.5  |
| Conductivity (dS m <sup>-1</sup> )                           | 0.4  | 0.2  | 0.2  |
| Organic matter (%)                                           | 1.2  | 1.2  | 1.5  |
| Nitrogen, Kjeldahl (%)                                       | 0.07 | 0.07 | 0.09 |
| C : N ratio                                                  | 10.8 | 9.9  | 10.0 |
| Phosphorus, Olsen (mg kg <sup>-1</sup> )                     | 5    | 4    | 4    |
| Potassium, ammonium acetate extracted (mg kg <sup>-1</sup> ) | 118  | 202  | 246  |
| Calcium carbonate (%)                                        | 48   | 44   | 51   |
| Active limestone (%)                                         | 9.0  | 6.6  | 10.5 |
| Magnesium, ammonium acetate extracted (mg kg <sup>-1</sup> ) | 182  | 242  | 314  |

**Table S2** Number of single fruitbodies sampled, according to the harvesting date (HD). Data are disaggregated for the peat-based substrate of the study site and for the bulk soil of each block (BS1, BS2 and BS3) (HD = 0 for the first day of the official harvesting season in Teruel province –15 November– and HD = 120 for the last day –15 March).

| HD        | -13 | 1  | 3  | 20 | 27 | 35 | 56 | 77 | 84 | 97 | 112 | 127 | Total |
|-----------|-----|----|----|----|----|----|----|----|----|----|-----|-----|-------|
| Substrate | 11  | 15 | 10 | 21 | 15 | 28 | 33 | 27 | 22 | 27 | 33  | 10  | 252   |
| BS1       | 10  | 7  | 0  | 7  | 7  | 8  | 17 | 8  | 10 | 10 | 20  | 10  | 114   |
| BS2       | 7   | 10 | 10 | 9  | 11 | 10 | 18 | 10 | 10 | 10 | 20  | 10  | 135   |
| BS3       | 7   | 8  | 0  | 10 | 1  | 9  | 18 | 10 | 10 | 10 | 10  | 10  | 103   |

**Table S3** Number of fruitbody clusters sampled, according to the harvesting date (HD). Data are disaggregated for the peat-based substrate of the study site and for the bulk soil of each block (BS1, BS2 and BS3) (HD = 0 for the first day of the official harvesting season – November 15th– and HD = 120 for the last day –March 15th).

| HD        | -13 | 1  | 3 | 20 | 27 | 35 | 56 | 77 | 84 | 97 | 112 | 127 | Total |
|-----------|-----|----|---|----|----|----|----|----|----|----|-----|-----|-------|
| Substrate | 9   | 26 | 4 | 19 | 23 | 21 | 40 | 18 | 16 | 14 | 8   | 5   | 203   |
| BS1       | 8   | 4  | 0 | 3  | 0  | 3  | 7  | 6  | 5  | 2  | 2   | 5   | 45    |
| BS2       | 2   | 3  | 4 | 2  | 6  | 4  | 7  | 2  | 1  | 4  | 5   | 0   | 40    |
| BS3       | 0   | 2  | 0 | 2  | 0  | 5  | 3  | 2  | 3  | 3  | 0   | 0   | 20    |

**Table S4** Categories defined for each one of the parameters used to estimate the fruitbody shape index (Dmin: minimum diameter, Dmax: maximum diameter). The shape index was calculated as the sum of the values assigned to sphericity, lobularity and height of lobules, thus ranging between 0 and 8.

| Parameter                | Description                                                                                                                                                                                                                                                          |
|--------------------------|----------------------------------------------------------------------------------------------------------------------------------------------------------------------------------------------------------------------------------------------------------------------|
| <i>Sphericity</i>        | Ratio between the measured Dmin and Dmax                                                                                                                                                                                                                             |
| 3                        | Dmin : Dmax ratio higher than 0,85                                                                                                                                                                                                                                   |
| 2                        | Dmin : Dmax ratio between 0.7 and 0.85                                                                                                                                                                                                                               |
| 1                        | Dmin : Dmax ratio between 0.5 and 0.7                                                                                                                                                                                                                                |
| 0                        | Dmin : Dmax ratio lower than 0.5                                                                                                                                                                                                                                     |
| <i>Lobularity</i>        | Percentage of the fruitbody surface occupied by lobules, visual estim.                                                                                                                                                                                               |
| 3                        | No lobules                                                                                                                                                                                                                                                           |
| 2                        | Lobules occupying 0-25% of the peridium surface                                                                                                                                                                                                                      |
| 1                        | Lobules occupying 25-50% of the peridium surface                                                                                                                                                                                                                     |
| 0                        | Lobules occupying more than 50% of the peridium surface                                                                                                                                                                                                              |
| <i>Height of lobules</i> | Average height of lobules in relation to fruitbody size, visual estim.                                                                                                                                                                                               |
| 2                        | No lobules                                                                                                                                                                                                                                                           |
| 1                        | Short lobules                                                                                                                                                                                                                                                        |
| 0                        | Tall lobules (for fruitbodies of about 10 g, lobules taller than 4 mm with respect to the theoretical ellipsoid defined by Dmax and Dmin; for fruitbodies of about 30 g, lobules taller than 6 mm; and for fruitbodies of more than 70 g, lobules taller than 10 mm) |

**Table S5** Loadings (and squared weights) of the predictor variables for each of the seven components retained in the partial least square regression performed to predict fruitbody weight (Dmax: maximum diameter, Dmin: minimum diameter, HD: harvesting date). For each component the cumulative percentage of variance of the response variable explained by the model ( $R^2$ -response) is included.

| Predictor                            | PC1            | PC2             | PC3             | PC4             | PC5             | PC6             | PC7              |
|--------------------------------------|----------------|-----------------|-----------------|-----------------|-----------------|-----------------|------------------|
| Dmax                                 |                |                 |                 |                 |                 |                 | 0.518<br>(0.29)  |
| Dmin                                 |                |                 |                 |                 |                 |                 | 0.25<br>(0.09)   |
| Dmax <sup>2</sup>                    |                |                 | 0.77<br>(0.57)  | -0.61<br>(0.31) | 0.21<br>(0.04)  |                 |                  |
| Dmin <sup>2</sup>                    |                |                 | 0.28<br>(0.08)  | 0.37<br>(0.02)  | -0.96<br>(0.82) | 0.27<br>(0.05)  |                  |
| Dmax × Dmin                          |                |                 | 0.43<br>(0.21)  | 0.75<br>(0.66)  | 0.29<br>(0.06)  | -0.23<br>(0.03) |                  |
| Dmax <sup>2</sup> × Dmin             | 0.84<br>(0.70) | -0.60<br>(0.27) | 0.19<br>(0.03)  |                 |                 |                 |                  |
| Dmax × Dmin <sup>2</sup>             | 0.54<br>(0.30) | 0.90<br>(0.59)  | -0.32<br>(0.10) |                 |                 |                 |                  |
| HD                                   |                |                 |                 |                 |                 | -1.50<br>(0.36) | 0.77<br>(0.59)   |
| No order within the dig <sup>1</sup> |                |                 |                 |                 |                 |                 | -0.312<br>(0.03) |
| $R^2$ -response                      | 62.34          | 62.88           | 91.52           | 92.85           | 92.93           | 92.95           | 97.32            |

<sup>1</sup> The fruitbodies within a dig were hierarchically ordered according to their weight

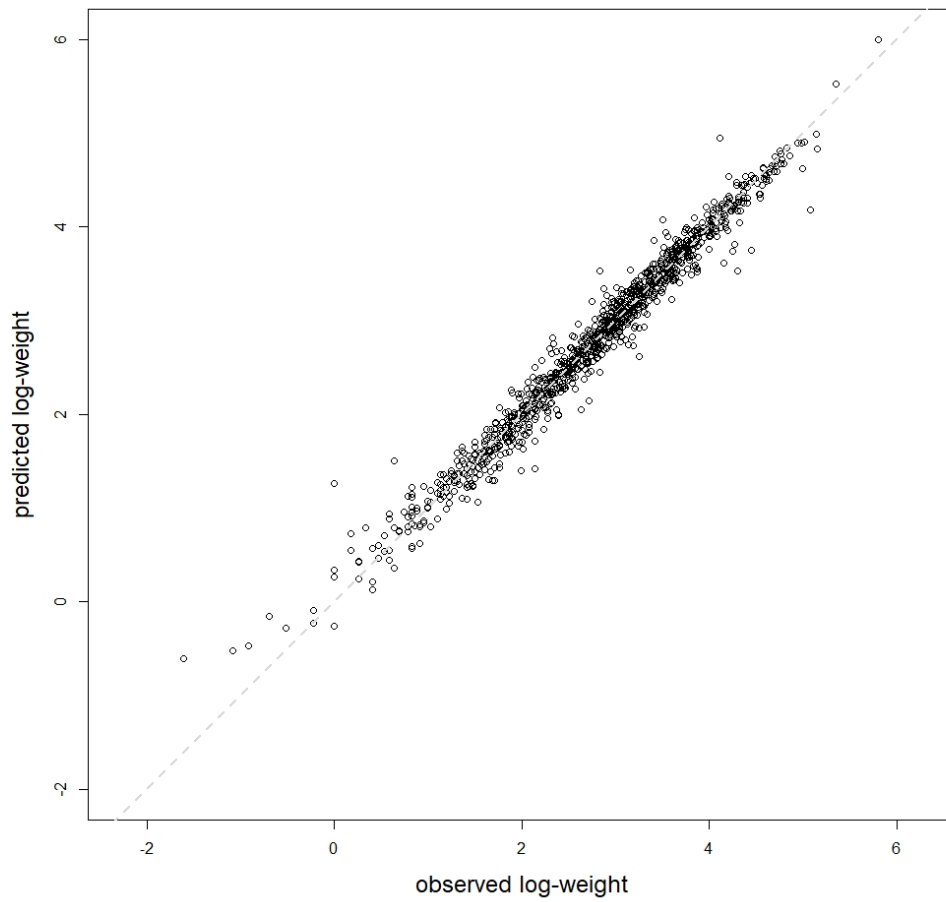

**Fig. S1** Relation between the actual (observed) value of fruitbody weight and the value predicted by the partial least squares regression for 2017-2018 data (values log-transformed,  $n = 1047$ ).

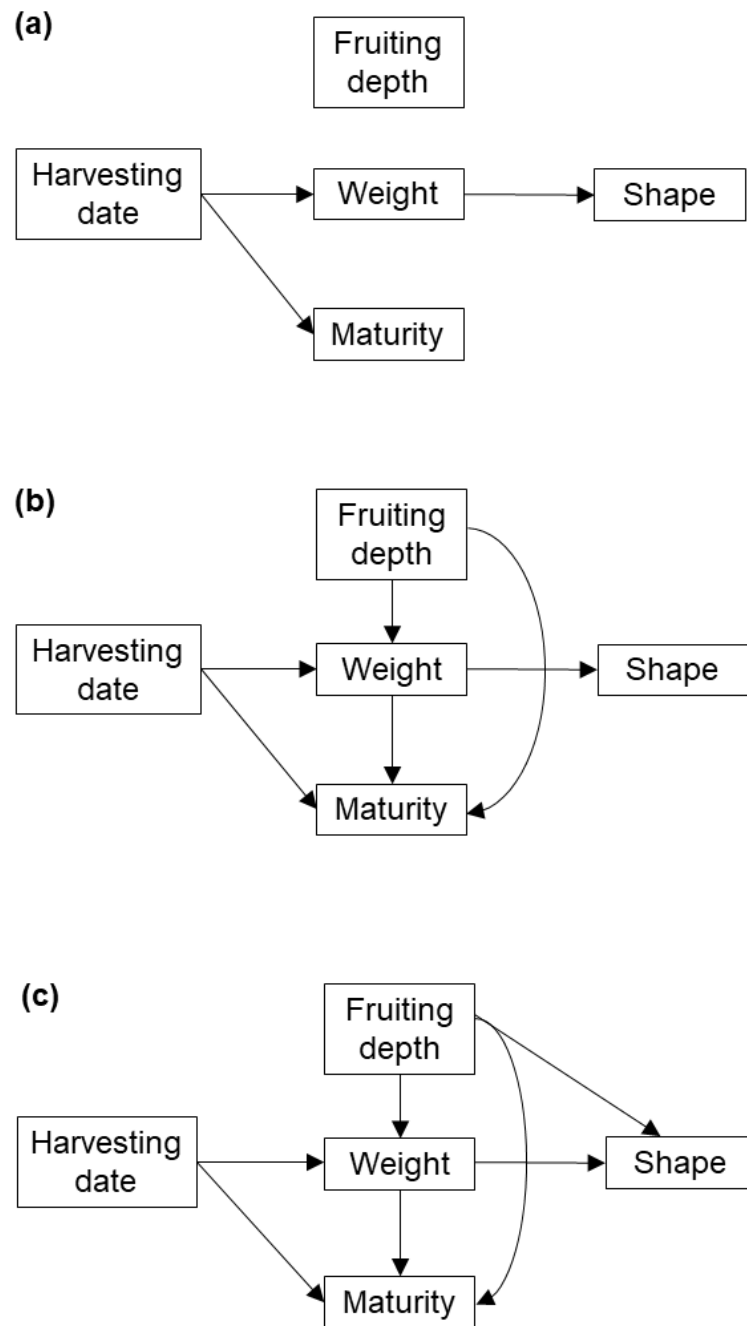

**Figure S2** The three alternative directed acyclic graphs tested for single fruitbodies (corresponding to models A-C in Table 2). For simplicity, the error variables and the unspecified links are not shown.

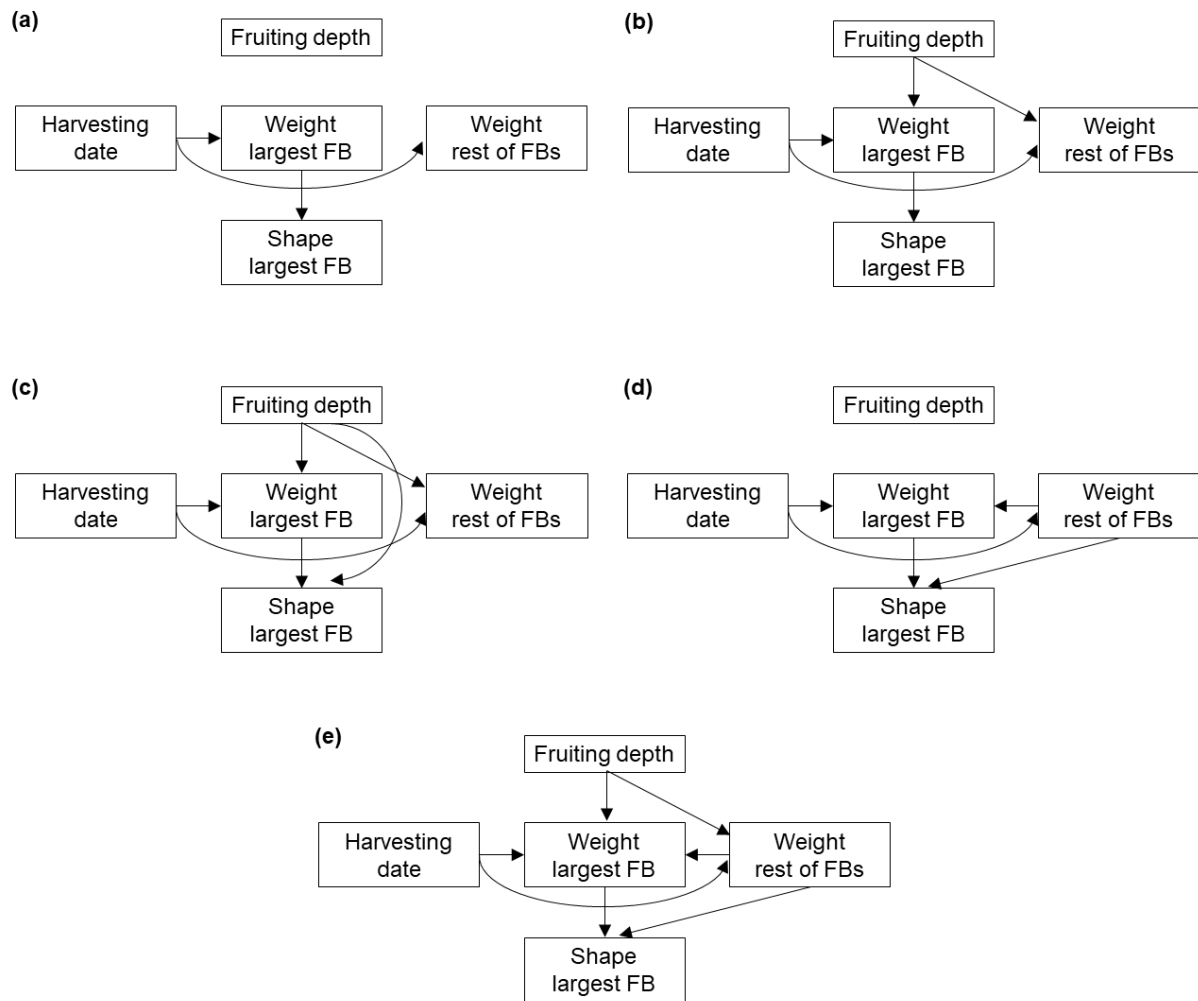

**Figure S3** The five alternative directed acyclic graphs tested for fruitbody clusters (corresponding to models A-E in Table 5). For simplicity, the error variables and the unspecified links are not shown. FB: fruitbody.

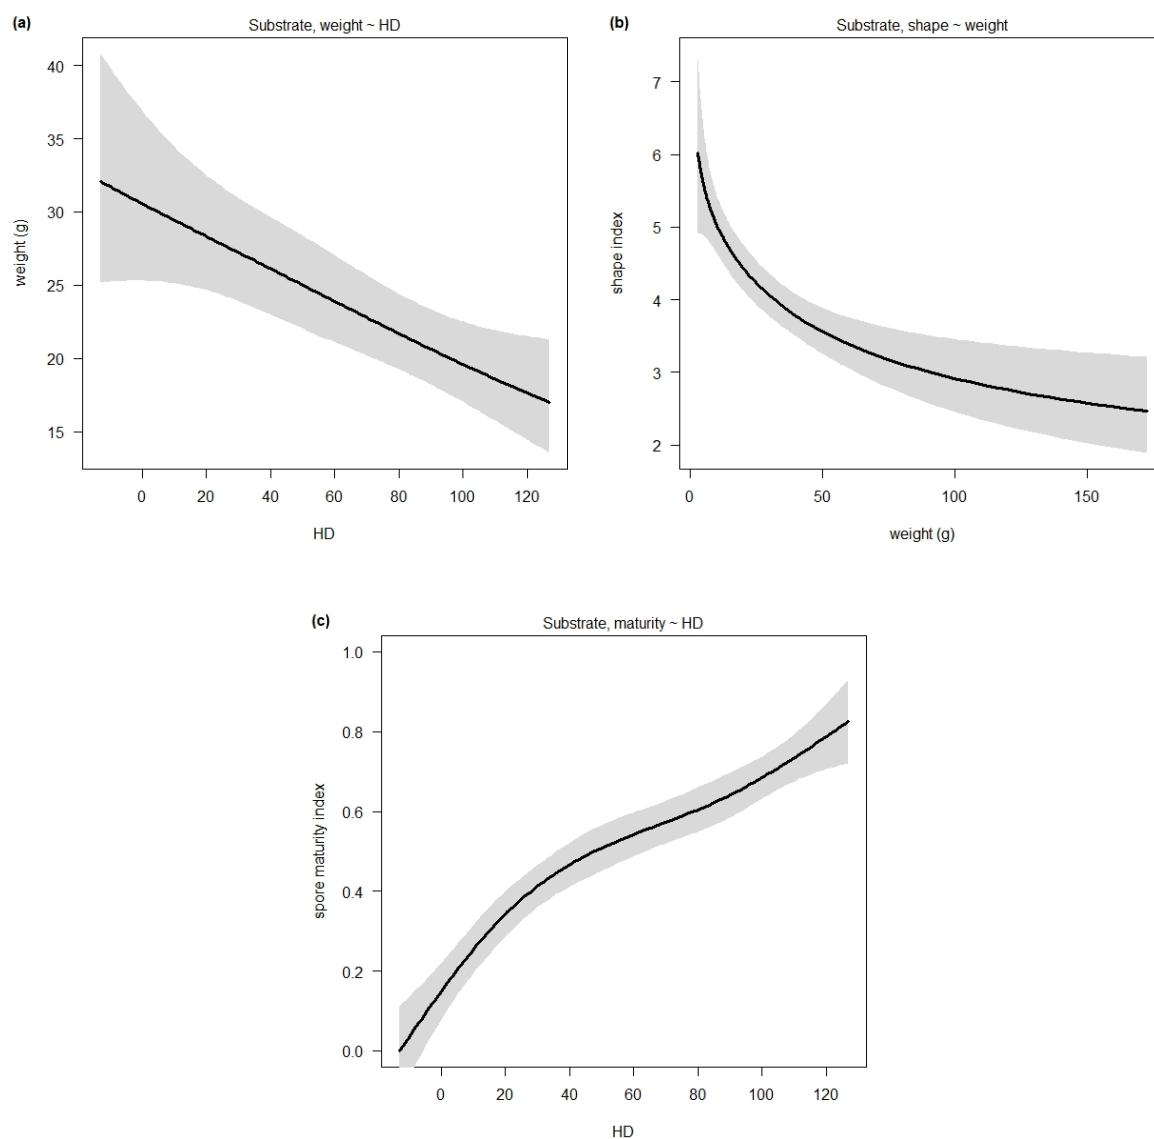

**Figure S4** Predicted relations (mean and 95% confidence band) between development characters according to the best-fit model for single fruitbodies in substrate (HD: harvesting date; HD = 0 corresponds to the 15 November and HD = 120 to the 15 March).



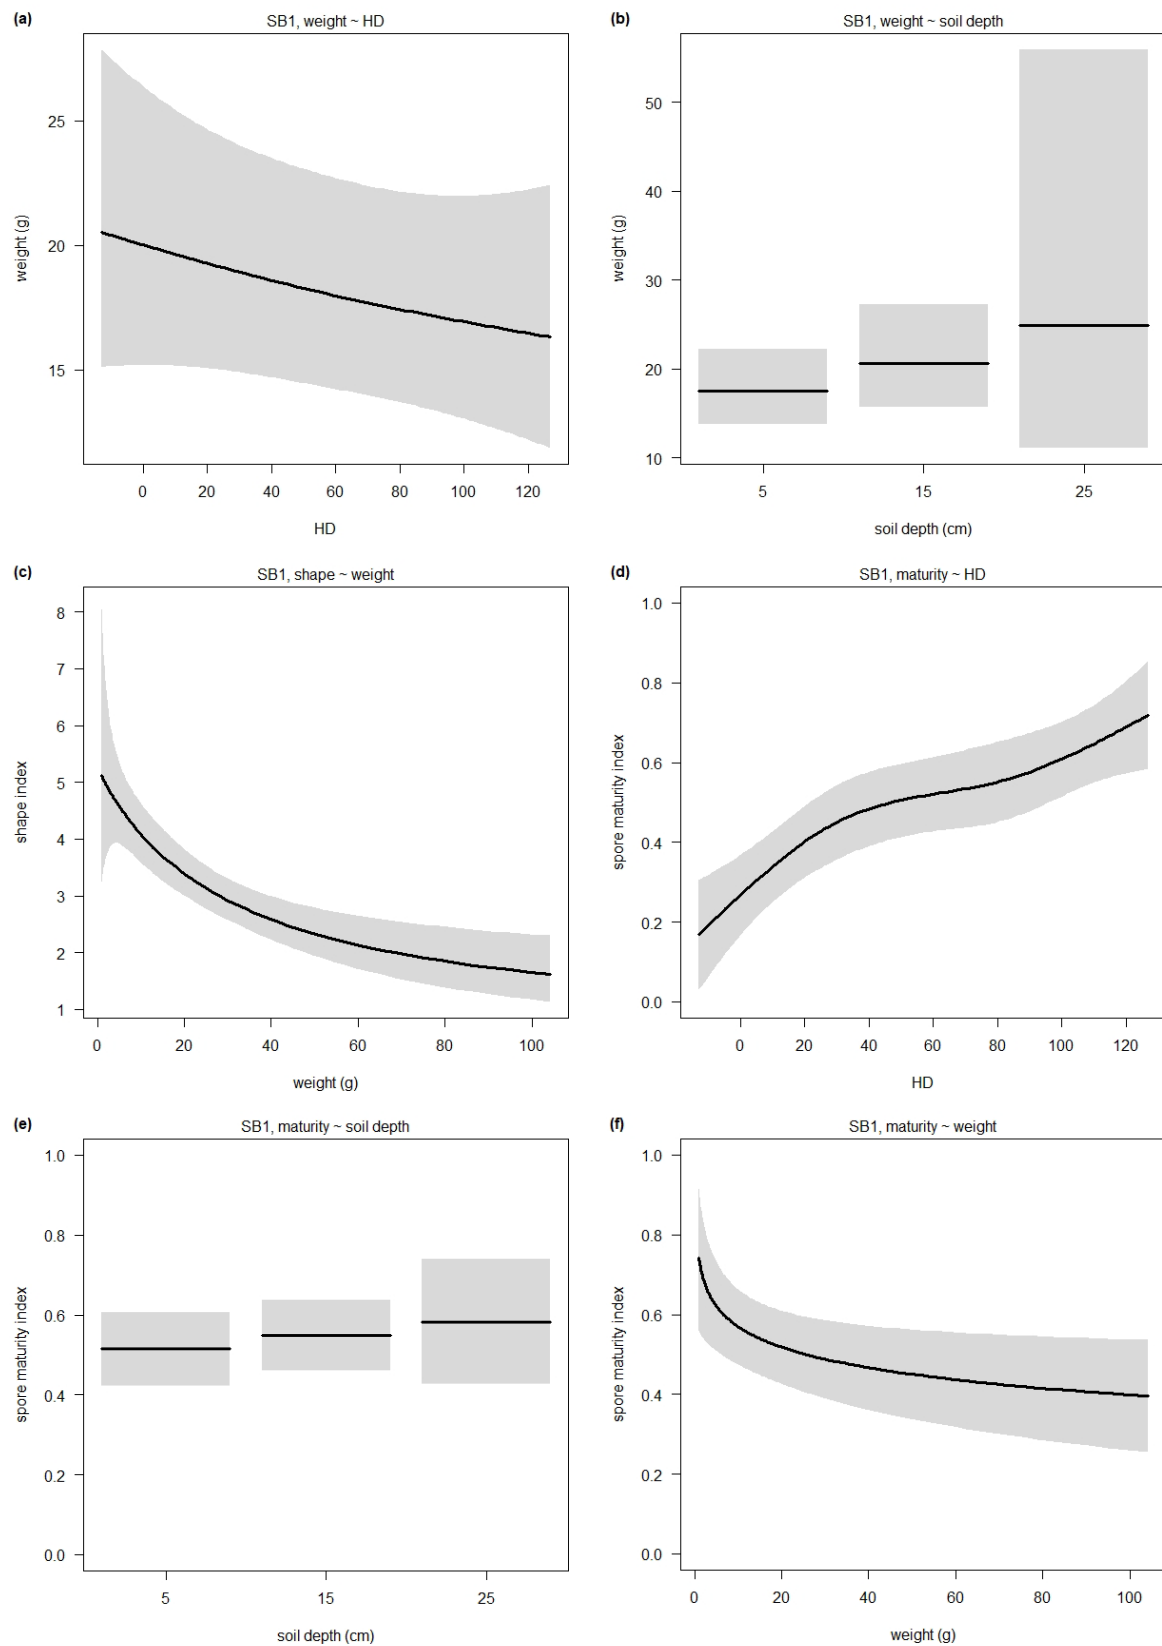

**Figure S5** Predicted relations (mean and 95% confidence band) between development characters according to the best-fit model for single fruitbodies in the bulk soil of block 1 (HD: harvesting date; HD = 0 corresponds to the 15 November and HD = 120 to the 15 March).

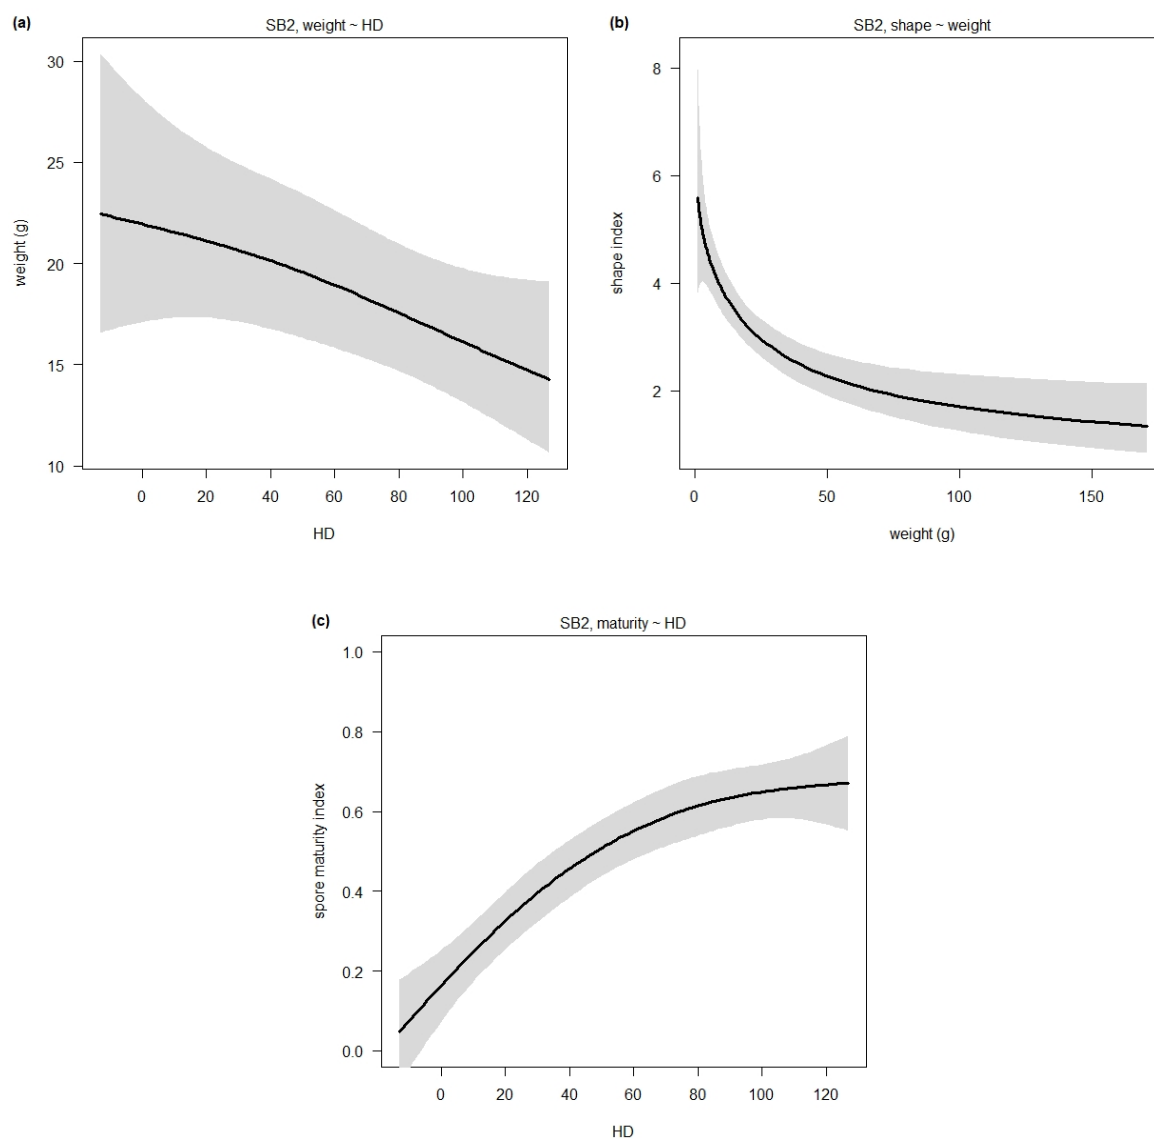

**Figure S6** Predicted relations (mean and 95% confidence band) between development characters according to the best-fit model for single fruitbodies in the bulk soil of block 2 (HD: harvesting date; HD = 0 corresponds to the 15 November and HD = 120 to the 15 March).

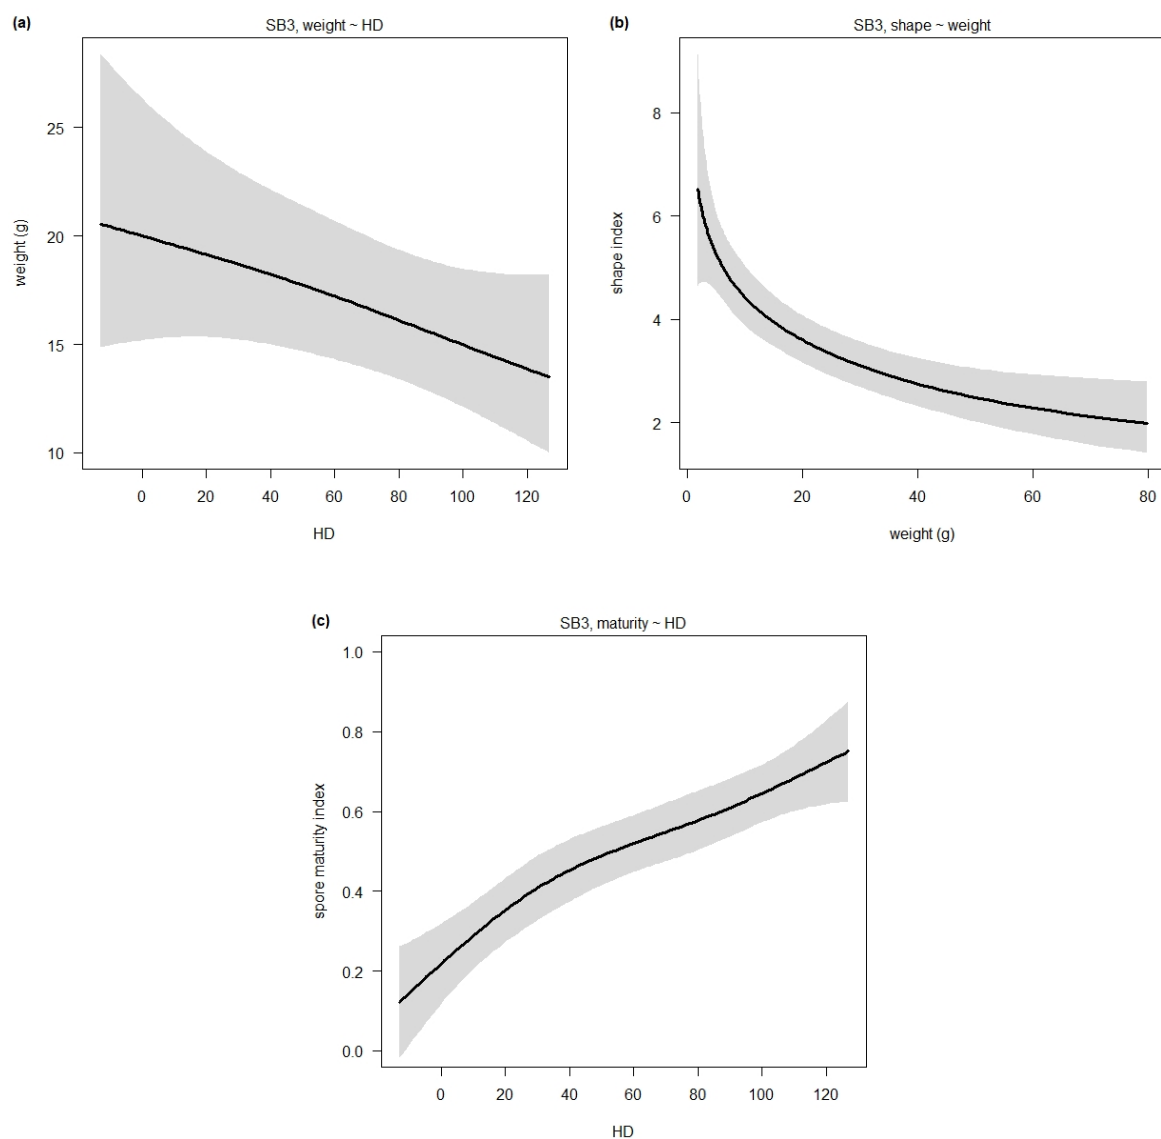

**Figure S7** Predicted relations (mean and 95% confidence band) between development characters according to the best-fit model for single fruitbodies in the bulk soil of block 3 (HD: harvesting date; HD = 0 corresponds to the 15 November and HD = 120 to the 15 March).

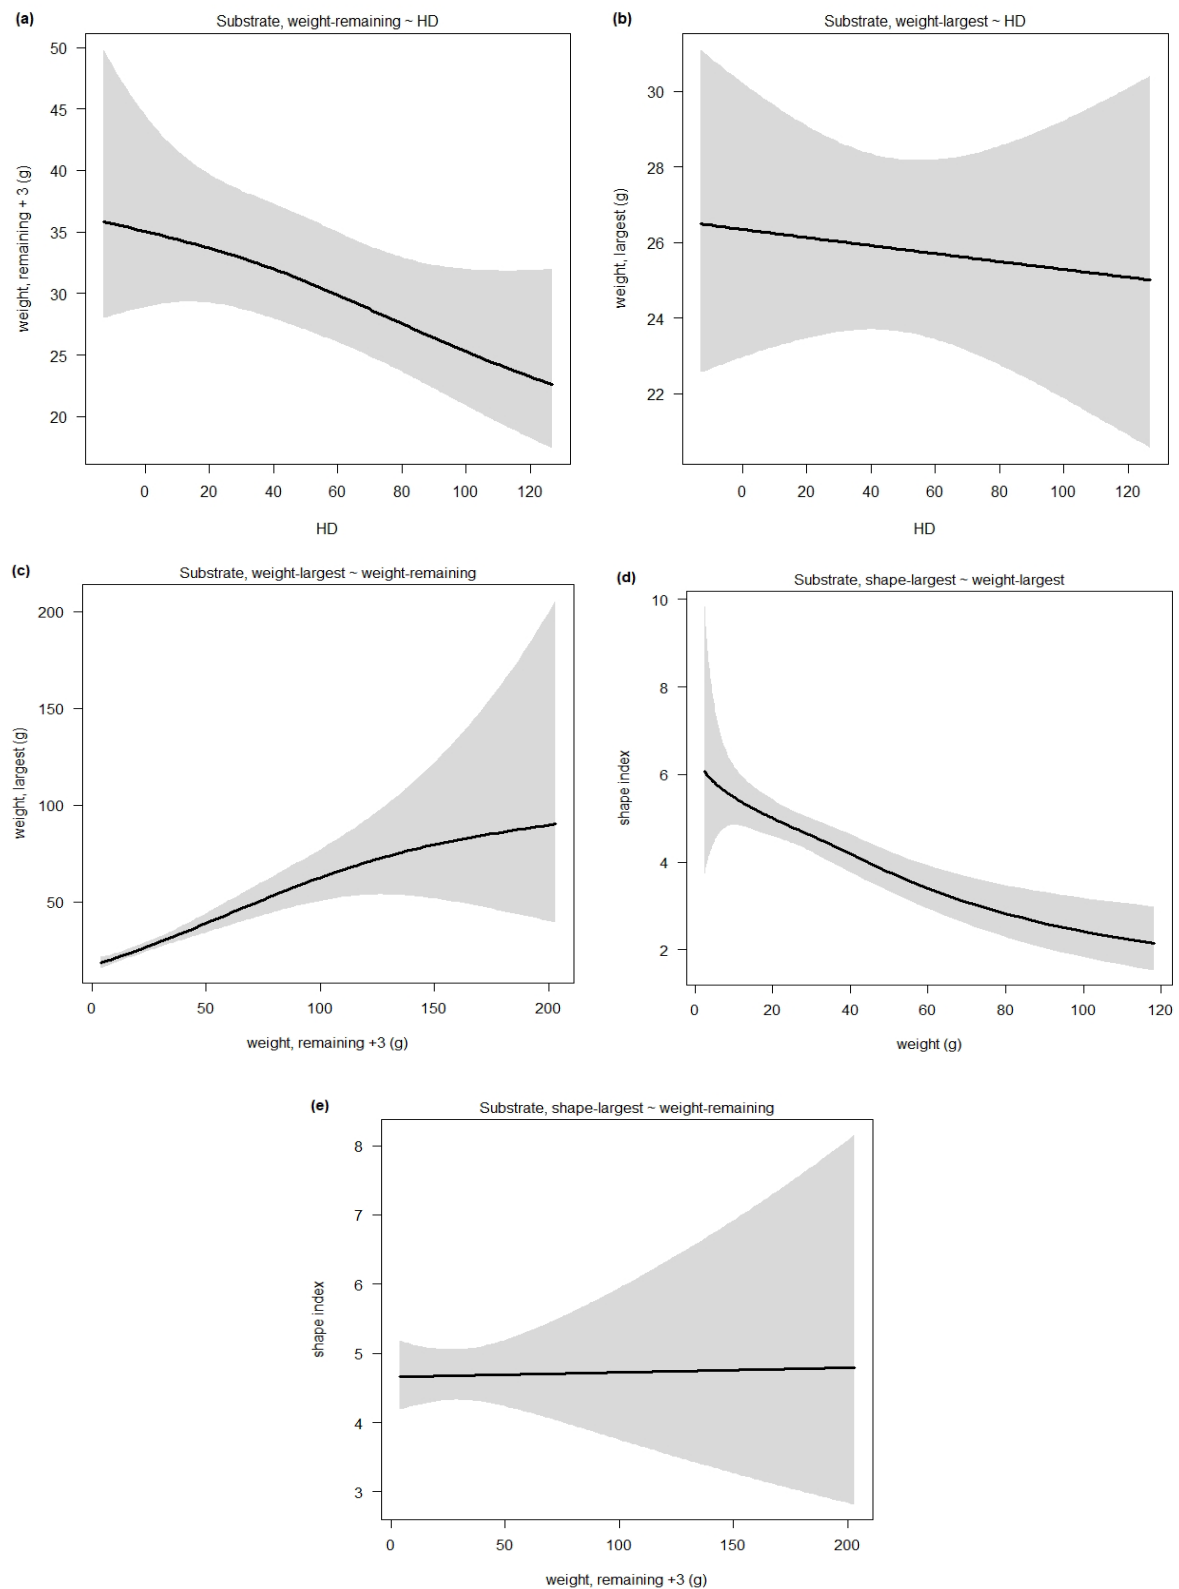

**Figure S8** Predicted relations (mean and 95% confidence band) between development characters according to the best-fit model for fruitbody clusters in substrate (HD: harvesting date; HD = 0 corresponds to the 15 November and HD = 120 to the 15 March).

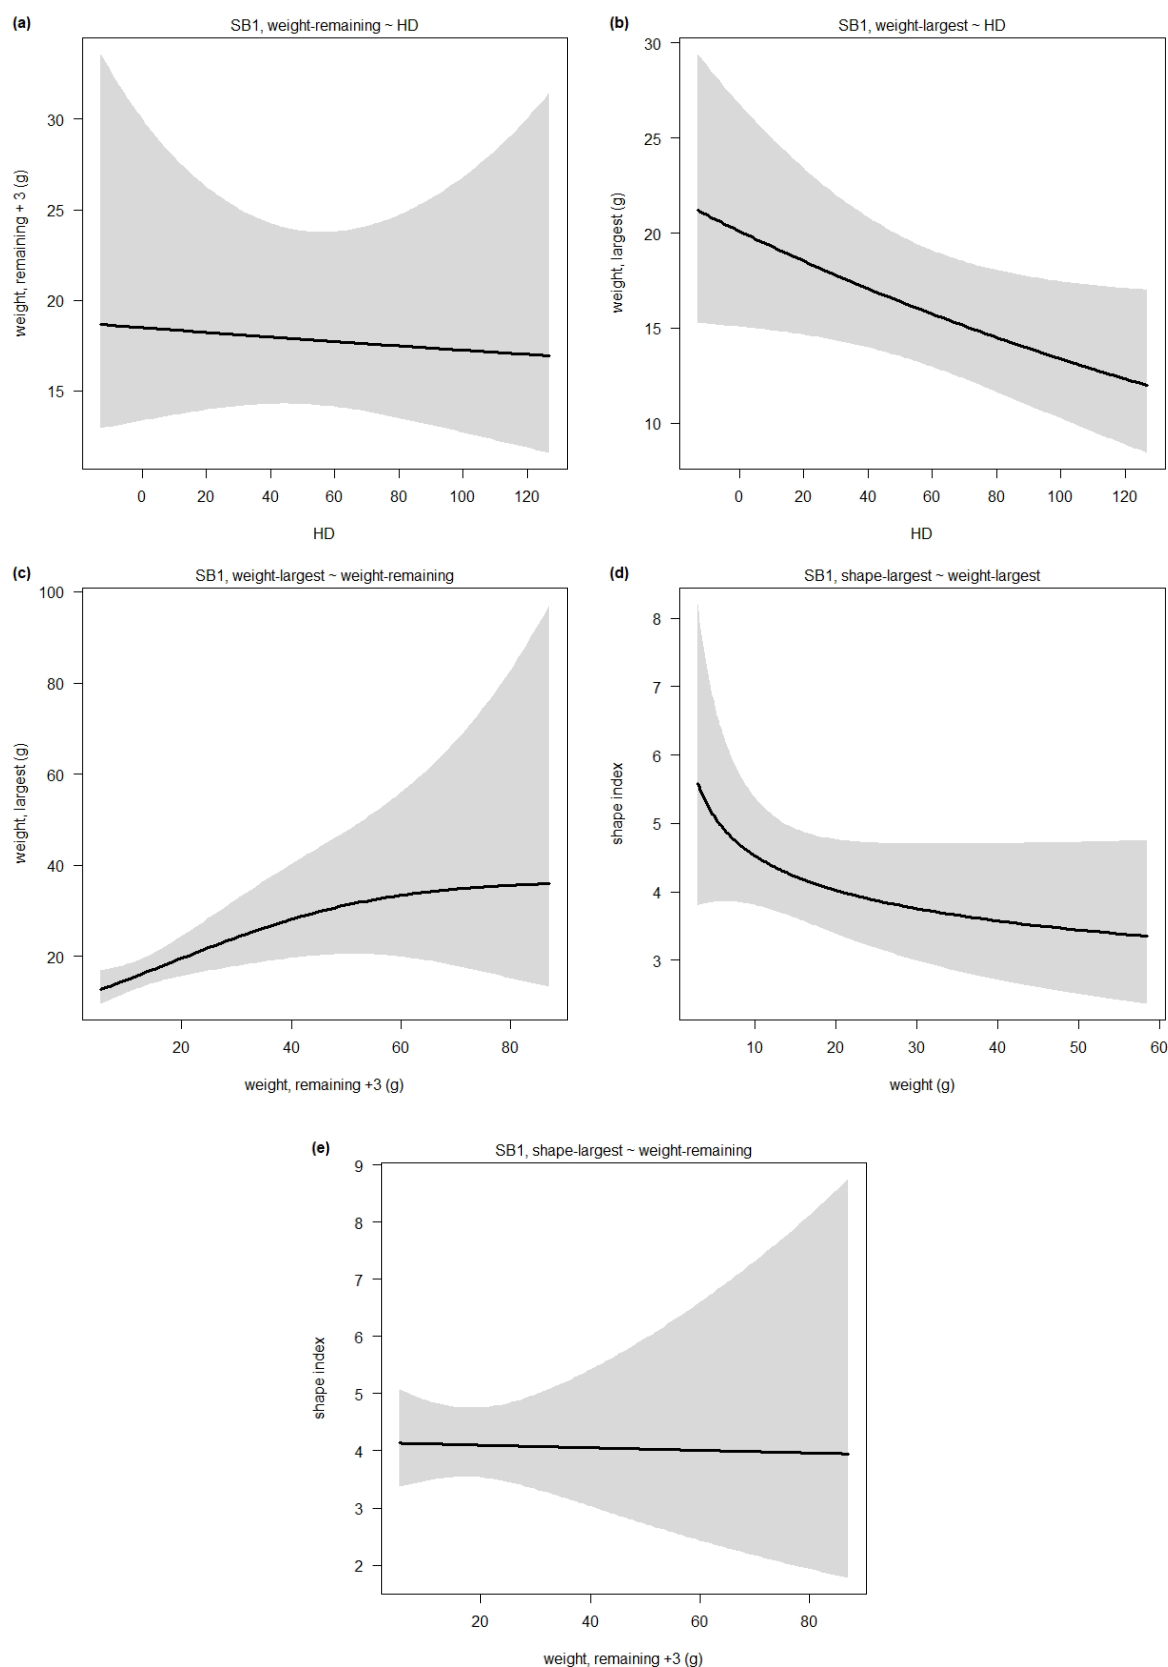

**Figure S9** Predicted relations (mean and 95% confidence band) between development characters according to the best-fit model for fruitbody clusters in the bulk soil of block 1 (HD: harvesting date; HD = 0 corresponds to the 15 November and HD = 120 to the 15 March).

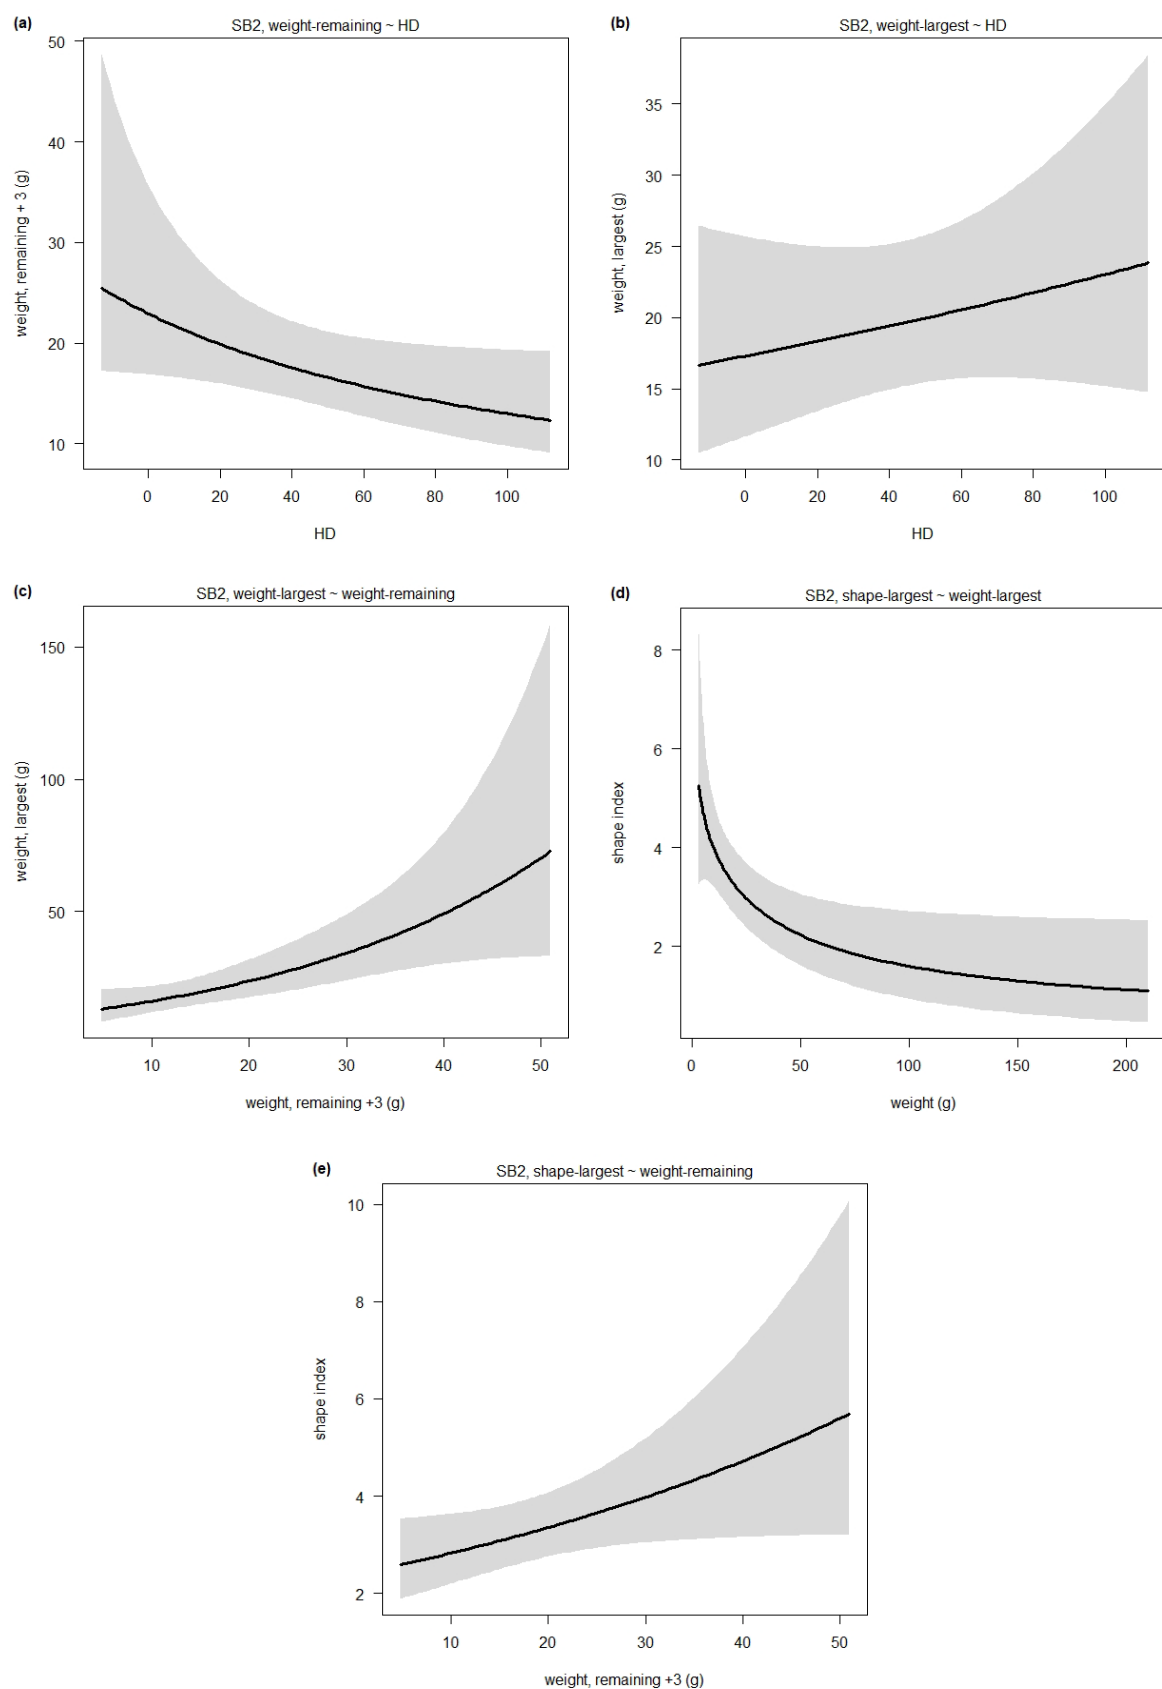

**Figure S10** Predicted relations (mean and 95% confidence band) between development characters according to the best-fit model for fruitbody clusters in the bulk soil of block 2 (HD: harvesting date; HD = 0 corresponds to the 15 November and HD = 120 to the 15 March).

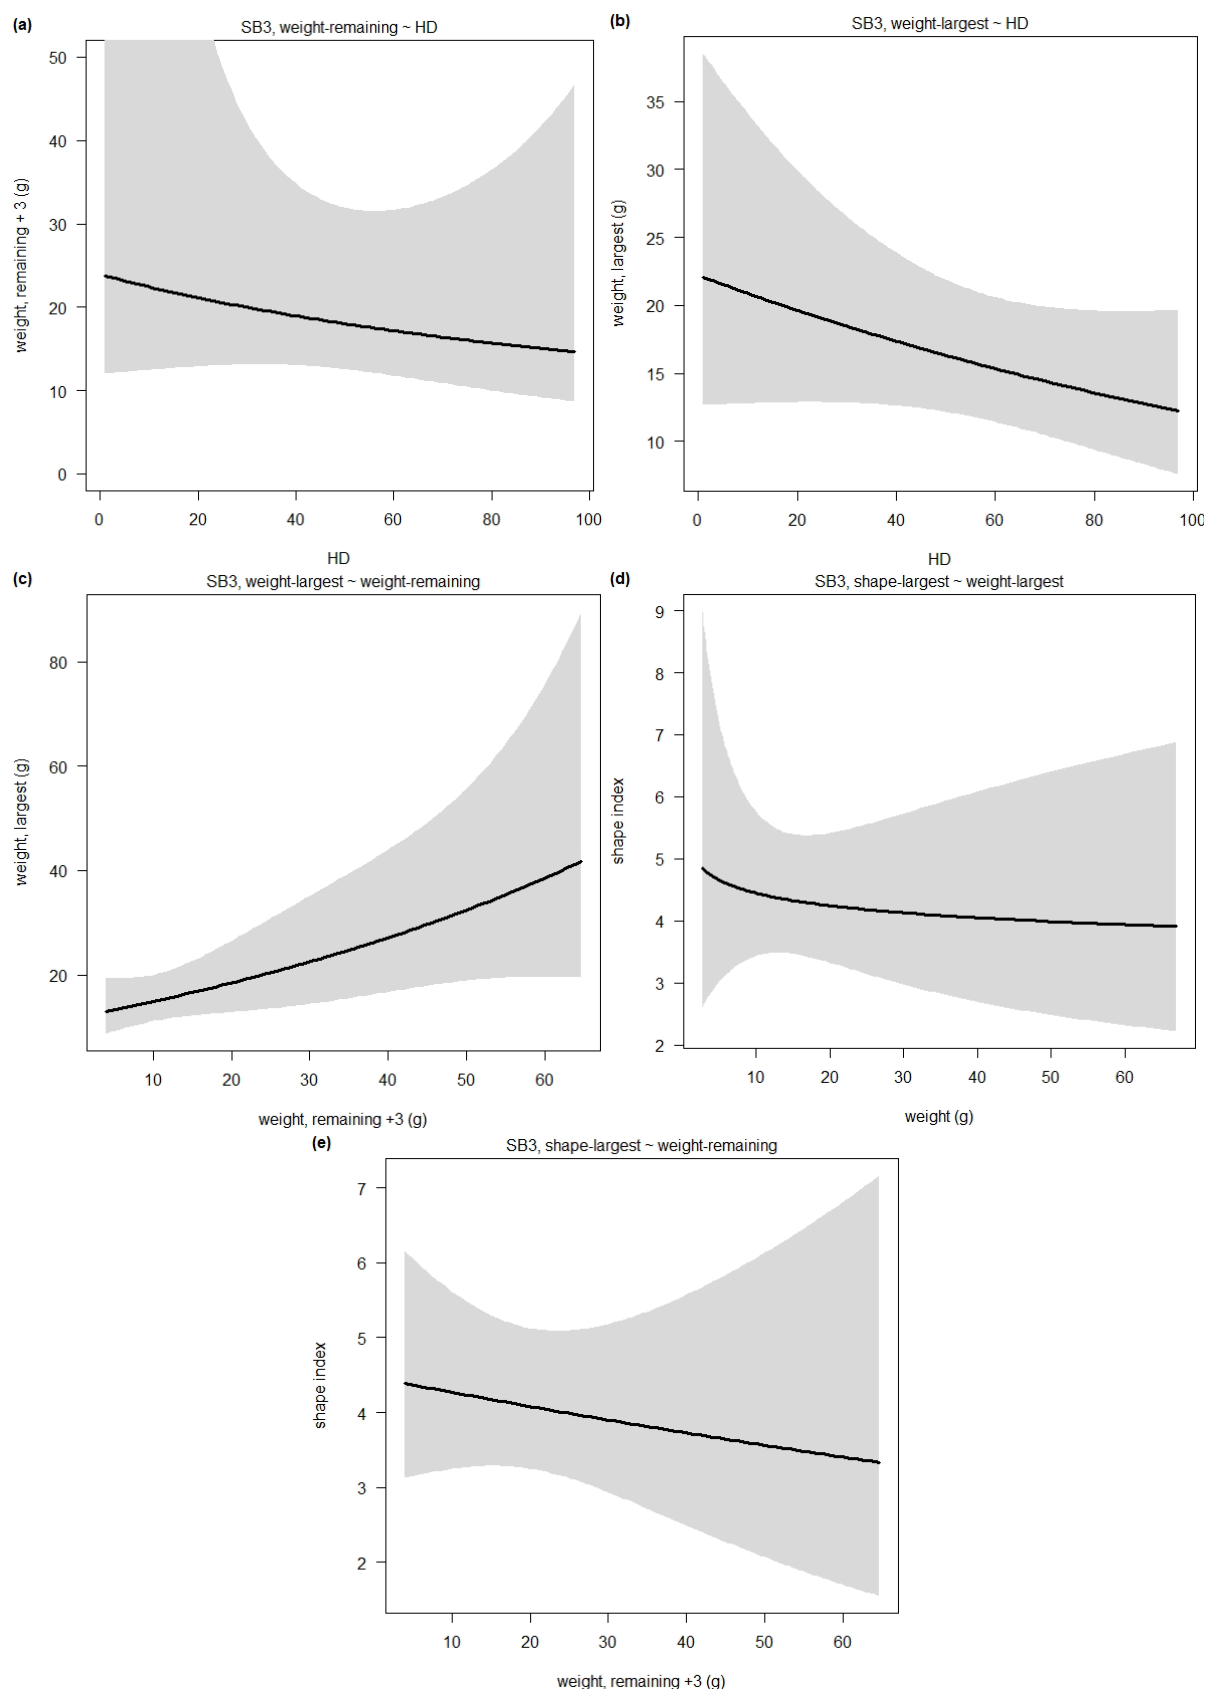

**Figure S11** Predicted relations (mean and 95% confidence band) between development characters according to the best-fit model for fruitbody clusters in the bulk soil of block 3 (HD: harvesting date; HD = 0 corresponds to the 15 November and HD = 120 to the 15 March).

**Table S6** Descriptive statistics for the development characters of single fruitbodies (SD: standard deviation, N: sample size). Data are disaggregated for the peat-based substrate of the study site and for the bulk soil of each block (BS1, BS2 and BS3).

|                                                  | Substrate   | BS1         | BS2         | BS3         |
|--------------------------------------------------|-------------|-------------|-------------|-------------|
| Weight (g)                                       |             |             |             |             |
| Mean (SD)                                        | 32.5 (27.4) | 27.8 (22.6) | 27.8 (28.1) | 23.6 (18.5) |
| Range                                            | 2.8, 173    | 1.0, 104    | 1.2, 171    | 1.9, 80     |
| N                                                | 252         | 114         | 135         | 103         |
| Shape index                                      |             |             |             |             |
| Mean (SD)                                        | 4.3 (1.8)   | 3.3 (1.8)   | 3.3 (1.9)   | 3.8 (2.0)   |
| Range                                            | 0, 8        | 0, 8        | 0, 8        | 0, 8        |
| N                                                | 252         | 114         | 135         | 103         |
| Spore maturity                                   |             |             |             |             |
| Mean (SD)                                        | 0.50 (0.33) | 0.53 (0.33) | 0.47 (0.34) | 0.50 (0.32) |
| Range                                            | 0, 0.96     | 0, 0.98     | 0, 0.92     | 0, 0.98     |
| N                                                | 237         | 110         | 129         | 100         |
| Fruiting depth (absolute and relative frequency) |             |             |             |             |
| 0-10 cm                                          | 81 (32%)    | 65 (57%)    | 69 (51%)    | 63 (61%)    |
| 10-20 cm                                         | 152 (60%)   | 44 (39%)    | 62 (46%)    | 40 (39%)    |
| 20-30 cm                                         | 18 (7%)     | 5 (4%)      | 4 (3%)      | 0           |
| 30-40 cm                                         | 1 (<1%)     | 0           | 0           | 0           |

**Table S7** Descriptive statistics for the development characters of the fruitbody clusters (SD: standard deviation, N: sample size). Data are disaggregated for the peat-based substrate of the study site and for the bulk soil of each block (BS1, BS2 and BS3).

|                                                  | Substrate   | BS1         | BS2         | BS3         |
|--------------------------------------------------|-------------|-------------|-------------|-------------|
| Weight of the largest fruitbody (g)              |             |             |             |             |
| Mean (SD)                                        | 34.7 (24.4) | 21.9 (13.5) | 32.0 (35.0) | 21.9 (14.0) |
| Range                                            | 2.6, 118    | 2.9, 58.5   | 3.3, 210    | 2.8, 67     |
| N                                                | 203         | 45          | 40          | 20          |
| Shape index for the largest fruitbody            |             |             |             |             |
| Mean (SD)                                        | 4.5 (1.8)   | 4.1 (1.7)   | 3.3 (1.8)   | 4.2 (1.9)   |
| Range                                            | 0, 8        | 1, 8        | 0, 7        | 1, 7        |
| N                                                | 203         | 45          | 40          | 20          |
| Weight of the remaining fruitbodies (g)          |             |             |             |             |
| Mean (SD)                                        | 27.9 (27.9) | 14.8 (15.0) | 14.6 (11.9) | 15.1 (17.9) |
| Range                                            | 1.0, 200    | 2.3, 84     | 1.8, 48     | 1.0, 62     |
| N                                                | 203         | 45          | 40          |             |
| Fruiting depth (absolute and relative frequency) |             |             |             |             |
| 0-10 cm                                          | 22 (12%)    | 22 (49%)    | 18 (60%)    | 8 (40%)     |
| 10-20 cm                                         | 135 (77%)   | 23 (51%)    | 11 (37%)    | 12 (60%)    |
| 20-30 cm                                         | 17 (10%)    | 0           | 1 (3%)      | 0           |
| 30-40 cm                                         | 2 (1%)      | 0           | 0           | 0           |
