# Supplementary material for: Lack of Linkages among Fruiting Depth, Weight, and Maturity in Irrigated Truffle Fungi Marks the Complexity of Relationships among Morphogenetic Stages
Source: J Fungi (Basel). 2021 Feb 1;7(2):102. doi: 10.3390/jof7020102 (PMC7912816; doi:10.3390/jof7020102)
Supplement: Supplementary file 1 [file jof-07-00102-s001.zip › File2_research_dataset.xlsx]

## Sheet: block0_indiv
dayofseason	depth	weight	maturity	diam1	diam2	sphericity	lobularity	regular	shape
-13	15	65.9	0	65.2	38.7	2	1	2	2
-13	15	5.6	0	26.1	19.8	3	2	2	4
-13	15	50.6	0	57	35	2	3	2	4
-13	5	172.9	0	77	52	2	3	3	5
1	15	47.9	0	54	38	3	2	2	4
1	15	30.4	0	51	27	2	1	1	1
1	15	81.7	0.1	59	45	3	2	2	4
20	5	26.5	0.02	41	33.1	3	3	3	6
20	15	19.4	0.12	40.3	26.8	2	3	2	4
20	5	10.4	0.54	37.8	23.6	2	2	2	3
20	15	85.9	0.38	37.11	50.6	3	2	2	4
20	5	6.6	0.24	26	21	3	3	2	5
20	5	24	0.48	41.9	26.9	2	2	2	3
20	15	48.15	0.32	53	40.25	3	3	3	6
27	5	21.9	0.68	35.4	34.4	4	4	3	8
27	5	10.4	0.76	31.3	22.9	3	3	1	4
27	15	29.2	0.68	44.7	30.8	2	3	3	5
27	5	12	0.436364	33.6	24.5	3	4	3	7
35	25	30	0.5	45.6	35.7	3	1	2	3
35	15	45.1	0	53	38.5	3	3	2	5
35	5	22.8	0.2	39.2	28.1	3	3	3	6
35	15	44	0	52.1	32.1	2	3	2	4
35	15	128.4	0	75.6	49.2	2	1	1	1
35	15	12.4	0	33.3	22.5	2	3	3	5
35	5	37.4	0.14	53.6	26.1	1	1	2	1
35	25	37.5	0.584906	56.7	25.9	1	2	1	1
56	15	16.9	0.627451	23.6	22.9	4	3	2	6
56	15	39.5	0.54	52.2	34.9	2	3	2	4
56	15	53.2	0.84	53.2	34.6	2	3	2	4
56	15	26.9	0.9	41	32.5	3	4	3	7
56	15	4.4	0	22.8	19	3	4	3	7
56	15	97.7	0.78	68.9	48.5	3	2	2	4
56	15	16.4	0.92	38	25.4	2	2	1	2
56	5	68.8	0.62963	60.8	42.3	2	1	1	1
56	15	20.2	0.78	44.6	26.3	2	2	1	2
77	5	13.8	0.48	34.5	25	3	3	3	6
77	5	28	0.230769	45.3	33.8	3	2	2	4
77	15	83.3	0.66	66.3	47.8	3	2	2	4
77	25	29.5	0.64	44.2	33.5	3	2	3	5
77	15	30.5	0.72	49.2	33	2	3	3	5
77	5	94.3	0.72549	72.5	36.8	2	1	1	1
77	15	24.3	0.653846	44.2	30.2	2	3	1	3
84	5	34.3	0.72	35	44	3	3	3	6
84	5	47.1	0.04	57	30	2	3	2	4
84	15	16.5	0.84	35	28	3	4	3	7
84	15	69	0.45098	63	38	2	2	1	2
84	15	7.7	0.6	28	22	3	3	3	6
97	5	24.3	0.666667	39	28	3	3	2	5
97	5	8.7	0.68	30	24	3	3	3	6
97	5	12.9	0.8	32	24	3	4	3	7
97	5	6	0.96	24	20	3	4	3	7
97	5	20.2	0.88	36	28	3	4	3	7
97	25	17	0.76	35	29	3	3	2	5
97	15	4.8	0	25	17	2	3	2	4
97	25	9.5		28	24	4	4	3	8
97	15	32.7		48	33	2	2	2	3
97	5	12.9	0.6	34	22	2	3	2	4
112	15	21.8	0.8	40	30	3	3	2	5
112	15	32.5	0.78	45	36	3	3	3	6
112	15	12	0.74	36	21	2	3	2	4
112	15	26.1	0.6	47	29	2	2	2	3
112	5	51.2	0.78	57	30	2	2	2	3
112	15	26.7	0.88	43.6	29.7	2	1	2	2
112	15	82.2	0.88	63.5	43.6	2	3	2	4
112	15	115.7	0.9	77.7	51.9	2	1	1	1
112	15	9.4	0.68	31.3	20.7	2	3	2	4
112	15	42.5	0.92	47.4	38.2	3	3	2	5
112	15	45	0	50.3	39.9	3	1	3	4
112	15	19.8	0.94	35.9	31.3	4	2	2	5
127	15	24	0.86	44	27	2	3	3	5
127	25	24.3	0.88	40	30	3	4	3	7
127	15	5.5	0.92	24	18	3	3	2	5
127	15	65.9	0.88	63	36	2	2	2	3
-13	5	11.9	0	32.6	22.7	2	3	3	5
-13	15	4	0	22.4	18.4	3	3	3	6
-13	15	41	0	51.2	32	2	1	2	2
-13	15	73.4	0	65.1	46	3	1	2	3
-13	15	9.4	0	36.4	17.3	1	2	2	2
1	15	18.2	0.26	41	31	3	2	2	4
1	5	21.9	0	37	31	3	2	2	4
1	15	74.7	0	63	41	2	1	2	2
1	15	98.8	0	70	45	2	2	2	3
1	15	3.9	0	19	15	3	1	1	2
1	15	53.3	0.02	63	36	2	2	2	3
1	5	99.6	0.58	67	45	2	2	2	3
3	15	34.6	0	53	32	2	1	1	1
3	5	38.6	0	53	36	2	2	3	4
3	25	46.5	0	53	36	2	1	1	1
3	15	12	0	38	19	2	3	3	5
3	15	73.4	0	64	40	2	2	2	3
3	15	22.8	0	40	29	3	3	3	6
3	15	13.6	0.8	40	19	1	3	3	4
3	15	58.8	0	61	36	2	3	3	5
3	5	68		56	48	4	1	2	4
3	15	15.8	0	34	27	3	4	3	7
20	15	2.8	0.8	19.9	15.3	3	3	3	6
20	15	31.3	0.745098	46.6	30.1	2	1	2	2
20	15	28	0.2	47.1	31.9	2	1	1	1
20	25	10.6	0.62	31.5	23.8	3	3	1	4
20	15	21.8	0.14	37.6	28.6	3	3	1	4
20	5	62.3	0.9	63.2	34.7	2	1	2	2
20	25	42.7	0.74	52.3	36.4	2	1	2	2
20	5	75.8	0.75	62.4	37.5	2	1	2	2
20	15	11.6	0.84	32	24.8	3	3	3	6
20	25	15.8	0.45	40.9	22	2	3	2	4
27	15	22.2		46.8	27.2	2	3	2	4
27	5	20.1	0.96	42	25.7	2	3	2	4
27	5	16.1	0	33.8	29.4	4	4	3	8
27	5	36.1	0	47	29.3	2	3	3	5
27	15	33.6	0.377358	48.5	33.1	2	3	2	4
27	5	25.1	0.04	39.9	27.1	2	3	2	4
27	5	28.1	0.2	42.7	32.2	3	3	3	6
27	5	51.8	0.868421	56.3	31.7	2	3	3	5
27	5	27.6	0.24	37	32.1	4	4	3	8
35	15	4	0.78	23.2	14.5	2	3	2	4
35	15	35	0.52	49.3	31.4	2	1	2	2
35	15	5.2	0.54	23.6	18	3	3	3	6
35	15	146	0.82	83	46	2	1	2	2
35	15	70.1	0.52	64.7	37.7	2	2	2	3
35	15	70.3	0.7	42.5	44.2	4	1	1	3
35	15	55	0.96	49.9	41	3	3	2	5
35	15	12.4	0.58	35.8	24.7	2	2	2	3
35	15	73.8	0.7	38	41.2	4	1	1	3
35	15	71.2	0.68	59.2	43.4	3	3	3	6
56	15	45.2	0.555556	52.5	37.9	3	3	3	6
56	15	36.3	0.3	44.6	37.1	3	3	3	6
56	15	15.2	0.849057	35.7	25.3	3	3	3	6
56	15	30.7	0.42	30.8	24	3	1	1	2
56	15	19.4	0.5	38.1	27.7	3	2	2	4
56	5	10	0.02	36.6	19.9	2	1	1	1
56	15	56.5	0.48	60.3	34.7	2	1	2	2
56	15	29.5	0.7	46.2	29.9	2	3	1	3
56	15	3.5	0.42	20.8	17.8	4	4	3	8
77	5	26.5	0.88	46.3	32.6	3	1	2	3
77	35	25.5	0.84	41.6	29.3	3	3	2	5
77	15	15.3	0.84	34.4	29.4	4	3	3	7
77	5	3.4		20.9	16.2	3	3	3	6
77	15	74.9	0.48	61.8	43.9	3	3	2	5
77	15	36.8	0.08	53.9	32.9	2	1	1	1
77	5	45.6	0.584906	51.8	38.3	3	1	1	2
77	15	8.4	0.96	29.4	19.8	2	3	2	4
77	15	20.2	0.459459	40.8	26.9	2	1	2	2
77	5	17.8	0.8	41	23.4	2	3	2	4
84	15	81		60	53	4	3	2	6
84	5	33.9		51.2	33	2	3	3	5
84	15	12.3		36	24	2	3	2	4
84	15	15.5		38	23	2	3	2	4
84	5	5.6		25	18	3	4	3	7
84	5	61.6		56	38	2	3	3	5
84	15	48.3		61	26	1	4	3	5
97	15	52.9	0.96	58	36	2	3	3	5
97	25	23.3	0.82	39	32	3	4	3	7
97	5	8.7	0.686275	27	21	3	3	3	6
97	5	18.2	0.58	40	21	2	3	2	4
97	5	17.2	0.08	37	26	3	4	3	7
97	5	25.8	0.173077	42	29	2	1	2	2
97	5	13.9	0.76	34	23	2	2	2	3
97	5	6	0.1	24	20	3	3	3	6
97	15	7.6	0.94	27	22	3	3	3	6
97	15	33.8	0.7	50	30	2	3	3	5
112	15	3.2	0.72	20	15	3	4	3	7
112	15	10.1	0.9	34	19	2	3	2	4
112	15	8.4	0.76	28	23	3	3	3	6
112	15	27.8	0.84	43	30	2	3	3	5
112	15	39	0.88	50	38	3	3	3	6
112	15	9.1	0.74	28	25	4	3	3	7
112	15	6.2	0.92	27.3	18	2	3	2	4
112	25	10.2	0.64	28.6	23.6	3	3	3	6
112	15	15.4	0.46	36.6	23.9	2	1	2	2
112	15	27.1	0.5	45.9	24.7	2	2	2	3
112	5	6.5	0.96	24	21	4	3	2	6
127	5	23.7	0.88	43	27	2	2	2	3
127	15	16.6	0.9	38	21	2	2	3	4
-13	25	147.3	0	86.8	38.2	1	1	1	0
-13	15	29	0	45.8	31.9	2	2	2	3
1	15	18.7	0.1	39	26	2	2	3	4
1	5	19.4	0.08	37	27	3	3	3	6
1	5	25.3	0.16	40	31	3	2	2	4
1	15	25.9	0.192308	48	28	2	3	3	5
1	5	37.9	0	49	30	2	1	2	2
20	5	42.5	0.82	53	32	2	2	2	3
20	15	54.3	0.26	56.4	31.3	2	1	1	1
20	5	61.3	0	28.9	69.3	1	2	1	1
20	15	27	0	39.7	30.2	3	1	2	3
27	5	23.8	0.576923	43.4	30.7	3	3	3	6
27	5	18.8	0.16	37.7	26.3	2	3	2	4
35	15	25.7	0	43.3	31.3	3	2	3	5
35	5	68.4	0	60.9	39.4	2	1	2	2
35	5	43.5	0.74	49.9	37.8	3	3	3	6
35	5	97.3	0.7	71	52	3	3	1	4
35	15	43.4	0.350877	53	28.7	2	2	2	3
35	15	23.5	0	37.9	32	3	2	3	5
35	15	35.8	0.72	47	33.9	3	3	2	5
35	15	21.2	0.82	39.3	22.9	2	3	2	4
35	5	33.2	0	46.5	32.1	2	2	2	3
35	15	22.9	0.78	48	19.8	1	2	1	1
56	15	10.8	0.705882	32.7	27.1	3	4	3	7
56	5	36	0.8	39	37	4	2	2	5
56	15	22.3	0.45098	38.7	30.4	3	4	3	7
56	15	8.6	0.176471	28.1	23.5	3	4	3	7
56	5	10.6	0.64	34.1	22.2	2	3	2	4
56	15	12.9	0	33.6	23.8	3	3	2	5
56	15	62.5	0.647059	59.3	43.8	3	3	1	4
56	15	124.5	0.08	77.6	55.7	3	1	1	2
56	15	54.6	0.156863	54.6	42.9	3	3	2	5
56	15	11	0.54902	32.6	22.6	2	2	1	2
56	15	12.2	0	31.6	23.2	3	2	2	4
56	15	48.7	0.64	65.3	26.8	1	1	1	0
56	15	22.6	0.8	42.4	30.4	3	2	2	4
56	15	25.9	0.857143	39.8	31.1	3	3	3	6
56	25	27.2	0	48.9	23.5	1	2	1	1
77	15	15.1	0.72	39.3	23.5	2	2	3	4
77	5	17.8	0.42	43.6	27.6	2	1	1	1
77	5	30.5	0.22	42.1	34.5	3	2	3	5
77	15	13.1	0.6	30.4	28.4	4	4	3	8
77	5	47	0.86	57	28	1	2	2	2
77	15	21	0.72	41.2	27.3	2	2	1	2
77	5	8.7	0.48	30.4	23.8	3	3	3	6
77	15	3.2	0.68	23.7	14.3	2	3	1	3
77	15	51.1	0.4	54.5	39.7	3	3	2	5
77	15	21.2		39.3	29.8	3	2	1	3
84	5	8.7	0.296296	29	19	2	3	3	5
84	5	7.5	0.76	27	22	3	3	3	6
84	5	43.4	0.74	50	37	3	2	3	5
84	15	7.9	0.88	28	23	3	4	3	7
84	25	40.9		55	32	2	2	2	3
84	5	31.5	0.557692	44	34	3	3	2	5
84	15	9	0.76	29	22	3	4	3	7
84	15	15.5	0.803922	34	29	4	4	3	8
84	25	34.7	0.408163	45	33	3	3	2	5
84	5	16.8	0.435897	36	27	3	4	3	7
97	5	20	0.68	48	23	1	3	2	3
97	5	30.4	0.686275	47	31	2	3	2	4
97	5	34.6	0.78	44	31	3	3	2	5
97	15	29.7		42	32	3	4	3	7
97	5	5.9	0.46	28	20	3	4	3	7
97	5	9.7	0.88	30	21	2	3	2	4
97	15	7.5	0.823529	27	21	3	3	3	6
112	15	17.4	0.88	37.3	24.4	2	3	3	5
112	15	12.7	0.96	35.6	21.7	2	3	2	4
112	15	28.8	0.5	45.3	27.7	2	3	1	3
112	15	46.4	0.8	53.6	35.7	2	2	2	3
112	25	11.4	0.88	29.3	24	3	3	3	6
112	15	7.1	0.6	28.6	16.9	2	3	1	3
112	15	16.9	0.8	31.1	25.1	3	2	3	5
112	15	30.3	0.66	43.8	29.7	2	1	2	2
112	5	48	0.92	48.8	32	2	2	1	2
112	15	26.7	0.8	43.1	30.9	3	1	1	2
127	25	7.9	0.84	29	20	2	4	3	6
127	15	16.2	0.830189	36	22	2	3	2	4
127	15	16.8	0.660377	35	27	3	3	2	5
127	15	15.5	0.72	33	28	3	3	2	5

## Sheet: block1_indiv
dayofseason	depth	weight	maturity	diam1	diam2	sphericity	lobularity	regular	shape
-13	5	25.3	0	43	30.3	3	2	2	4
-13	5	9.8	0	30	20.6	2	2	1	2
-13	15	54.4	0	60.5	31.4	2	1	1	1
-13	5	23	0	48	22	1	1	1	0
-13	5	19.9	0	37.8	28.6	3	3	2	5
-13	5	97.1	0	72.7	44.6	2	1	1	1
-13	15	7.6	0	24	19.9	3	2	2	4
-13	5	90.6	0	72	39.3	2	1	1	1
-13	5	25.5	0	45.1	30.9	2	2	1	2
-13	5	24.2	0	35.1	25.3	3	2	2	4
1	5	18.3	0.72	36	24	2	3	3	5
1	5	50.6	0	58	37	2	3	2	4
1	5	24.6	0.52	37	31	3	1	2	3
1	5	21.2	0	39	30	3	2	2	4
1	5	41.3	0.48	55	32	2	2	2	3
1	5	3.6	0.74	22	14	2	1	1	1
1	15	23.5	0.88	44	35	3	2	2	4
20	5	10.2	0.7	29.7	23.8	3	3	2	5
20	5	18.6	0.653061	39	26.6	2	3	1	3
20	5	22.5	0.76	42.8	30.6	3	1	2	3
20	5	38.8	0.26	49.6	36.2	3	3	2	5
20	5	7.5	0.88	27.7	21.2	3	3	2	5
20	5	41.2	0.0384615	52.1	33.6	2	2	2	3
20	5	20.8	0.45098	41.4	29.6	3	3	2	5
27	5	11	0.54	33	23.7	3	4	2	6
27	15	16	0.08	34.2	26.7	3	3	1	4
27	5	14.2	0.32	34.3	23.9	2	3	2	4
27	15	18	0.22	37.4	28.2	3	2	1	3
27	5	12.1	0.56	28.5	20.1	3	3	1	4
27	5	39.8	0.34	51.1	38.9	3	2	1	3
27	5	32.5	0.54	46.5	31.3	2	3	2	4
35	5	76.7	0.14	65.7	45.7	2	2	2	3
35	25	20.8	0	40.3	29	3	2	3	5
35	5	47.6	0	54.1	35.8	2	1	1	1
35	5	27.2	0.88	44.3	30	2	1	1	1
35	5	27.7	0.5	41	31.6	3	2	2	4
35	15	13.3	0.98	31.8	26.1	3	2	3	5
35	5	17.1	0.72	34.4	26.5	3	2	3	5
35	15	67.4	0.7	59.1	50.2	3	2	1	3
56	15	30	0.78	52.3	26.4	2	2	2	3
56	15	23.5	0.729167	42.5	29.2	2	3	3	5
56	15	16.3	0.0535714	33.7	29.2	4	3	3	7
56	15	42.9	0.74	55.5	38.1	2	2	2	3
56	15	23.2	0	40.7	33.2	3	4	2	6
56	15	37.3	0.705882	50.6	34.9	2	2	2	3
56	15	50.2	0	56.1	39.2	2	1	2	2
56	15	18	0.66	40.9	25.9	2	1	1	1
56	5	35.9	0.74	53	28.8	2	1	1	1
56	5	12.3	0.68	32.4	25.3	3	3	3	6
56	25	8.2	0.62	28.6	23.9	3	2	3	5
56	5	5	0.84	24.5	19.8	3	3	3	6
56	15	5.5	0.74	26.5	15.5	2	1	1	1
56	15	21.4	0.82	43.9	29.7	2	3	1	3
56	5	13.9	0	26.3	22.5	4	2	2	5
56	5	5.8	0.82	23.3	19.5	3	3	2	5
56	5	4.4	0.88	22.6	16.4	3	1	1	2
77	15	6.7	0.509434	32.9	19	2	1	1	1
77	15	8.6	0.78	28.9	23	3	2	3	5
77	25	48.3	0.08	51.1	37.2	3	2	1	3
77	15	68	0.22	65.5	40.6	2	1	1	1
77	5	104.3	0	75.6	42.8	2	1	1	1
77	5	5.4	0.62	25.2	18.9	3	2	3	5
77	15	4.7	0.74	24	17.4	3	3	3	6
77	15	24.3	0.82	42.2	30.9	3	3	2	5
84	5	20	0.56	44	29	2	2	2	3
84	15	52.4	0.771429	54	38	3	2	2	4
84	15	30		40	33	3	2	3	5
84	5	4.1	0.02	24	18	3	4	3	7
84	5	12.2	0.84	34	29	4	3	3	7
84	15	46.8	0.82	55	36	2	2	2	3
84	15	88.1	0.519231	60	47	3	1	1	2
84	5	33.8		50	25	2	2	2	3
84	5	74.4	0.48	70	46	2	1	1	1
84	5	7	0.0188679	29	21	3	3	3	6
97	15	49.7	0.326923	62	33	2	1	1	1
97	5	5.2	0.8	24	19	3	3	3	6
97	15	27.8	0.56	46	28	2	1	1	1
97	15	4.9	0.94	26	19	3	3	3	6
97	15	34.1	0.62	50	30	2	1	2	2
97	5	37.4	0.596154	52	33	2	1	2	2
97	5	10.3	0.84	30	22	3	2	2	4
97	5	9.8	0.7	32	21	2	2	2	3
97	5	4.4	0.8	26	19	3	3	3	6
97	5	84.1		70	35	2	1	2	2
112	5	17.2	0.84	36	28	3	1	2	3
112	5	3.6	0.764706	23	15	2	2	2	3
112	15	19.3	0.74	40	24	2	1	2	2
112	15	25.6	0.7	53	29	2	1	1	1
112	15	48.8	0.82	57	37	2	1	1	1
112	5	17	0.84	35	27	3	3	3	6
112	15	1	0.76	13	11	3	4	3	7
112	5	15.7	0.12	39	26	2	1	1	1
112	5	35.5	0.76	46	36	3	2	2	4
112	5	69.7	0.52	61	43	3	2	1	3
112	5	16.2	0.88	40.4	20.7	2	2	1	2
112	5	12.9	0.94	45.8	19.6	1	1	1	0
112	5	14.3	0.452381	36.2	25.3	2	2	3	4
112	5	3.1	0.12	24.6	13.4	2	3	2	4
112	5	4	0.86	23.4	16.6	3	2	2	4
112	15	11.3	0.7	33.1	23.2	3	1	1	2
112	15	3.6	0.96	20.9	17.5	3	3	3	6
112	15	3.1	0.84	21.7	14.9	2	2	2	3
112	25	36	0.92	45.3	34.6	3	1	2	3
112	15	32.7	0.9	54.9	23.9	1	1	1	0
127	15	55.1	0.78	56	27	1	1	1	0
127	25	31.9	0.88	51	29	2	2	2	3
127	5	28.4	0.354167	43	30	2	2	1	2
127	5	38.6	0.764706	47	37	3	1	2	3
127	15	35	0.843137	53	30	2	1	1	1
127	15	77.5	0.84	74	41	2	1	2	2
127	15	31.1	0.8	44	29	2	2	2	3
127	15	8.4	0.686275	30	20	2	3	1	3
127	15	27.9		44	32	3	2	1	3
127	5	19	0.6	38	29	3	3	2	5

## Sheet: block2_indiv
dayofseason	depth	weight	maturity	diam1	diam2	sphericity	lobularity	regular	shape
-13	15	6.4	0	24.2	21	4	3	3	7
-13	5	46.7	0	54.9	37	2	1	1	1
-13	5	12.1	0	36.6	17.2	1	2	2	2
-13	15	150.3	0	79	52	2	1	2	2
-13	5	8.7	0	30	21	2	2	3	4
-13	15	66.4	0	66.6	30.6	1	1	1	0
-13	15	171	0	82.4	56.4	2	1	1	1
1	5	32.2	0	50	30	2	1	1	1
1	5	78.9	0.7	68	38	2	1	1	1
1	15	41.7	0	53	33	2	1	1	1
1	5	28.5	0.72	49	27	2	1	2	2
1	5	20.3	0.627451	39	29	3	2	2	4
1	5	3	0	19	16	3	3	3	6
1	5	17.8	0	39	26	2	2	2	3
1	5	19.6	0	47	25	2	1	1	1
1	5	11.9	0	31	26	3	3	2	5
1	5	69.8	0	58	42	3	1	1	2
3	15	15	0.22	44	22	2	2	2	3
3	15	22.9	0	39	27	2	2	3	4
3	5	8.6	0	30	22	3	2	3	5
3	15	6	0	26	17	2	4	3	6
3	15	4	0	23	17	3	3	3	6
3	5	3.8		26	14	2	3	2	4
3	5	6	0	26	16	2	2	1	2
3	5	32.9		50	29	2	2	3	4
3	25	24.2	0	42	29	2	2	3	4
3	15	19.7	0	46	24	2	1	1	1
20	5	5	0.82	26.9	15.7	2	3	2	4
20	15	20.8	0.06	42.4	29.2	2	1	1	1
20	5	16.9	0.86	46.6	21.9	1	1	1	0
20	15	33.1	0.64	45.1	33.3	3	3	3	6
20	5	13.5	0	36.5	23.4	2	1	2	2
20	25	112.1	0.6	74.7	47.3	2	1	1	1
20	15	12	0.56	32	23.3	3	3	3	6
20	25	7.9	0.830189	31.3	22	3	2	1	3
20	15	39.1	0.82	48.6	36.6	3	1	1	2
27	15	14.2	0.277778	31	29	4	4	2	7
27	5	43.1	0	49.7	36.1	3	1	1	2
27	5	26.9	0	45.4	29.2	2	2	1	2
27	15	24.8	0	42.7	29.3	2	3	3	5
27	15	99.5	0.117647	71.8	44.9	2	2	1	2
27	5	30.2	0.18	43.6	30.6	3	2	2	4
27	5	36.1	0.923077	52	30.1	2	3	2	4
27	15	44.8	0.44	50.5	31.9	2	3	3	5
27	5	52.7	0.4	55.1	37.9	2	2	2	3
27	5	47.6		53.5	35.9	2	2	2	3
27	5	36.9	0.04	47.5	33.3	3	2	2	4
35	15	9	0.42	31.5	22.6	3	2	1	3
35	15	23.8	0.72	46.1	27	2	2	1	2
35	5	19.2	0	38.2	26.8	3	1	1	2
35	5	10.7	0.68	33.6	14.9	1	3	3	4
35	5	6	0.196078	25.8	20.6	3	3	2	5
35	25	6.8	0.5	27	20.6	3	3	1	4
35	15	16	0.8	37.2	23.5	2	3	2	4
35	15	25.5	0.32	44.7	27.3	2	2	1	2
35	15	109.6	0.58	75.4	48.7	2	1	1	1
35	15	82.1	0.88	65.9	43.8	2	2	1	2
56	15	15.3	0.78	36.8	22.7	2	3	3	5
56	15	5	0.15625	21.7	15.6	3	3	3	6
56	15	17.9	0.86	36.7	27.6	3	2	3	5
56	5	8.9	0	28.4	21.9	3	3	3	6
56	5	17.1	0.64	34.6	29.4	3	3	3	6
56	15	18.2	0	39.5	29.9	3	2	1	3
56	15	8.6	0.0222222	29	22.1	3	3	3	6
56	15	22.7	0.2	42.8	29	2	2	2	3
56	5	1.2	0.8	17.4	11.5	2	2	1	2
56	15	14.9	0.52	44.3	18.7	1	2	1	1
56	15	43	0.74	57.5	31.8	2	1	1	1
56	15	33.4	0.8	44	31	3	3	2	5
56	5	29	0.68	42.8	32.6	3	3	3	6
56	5	12.7	0.78	30.8	25.7	3	2	3	5
56	15	42	0.02	54.8	31.6	2	2	1	2
56	15	55.9	0.8	62.8	32.1	2	1	1	1
56	5	25.3	0.74	42.3	31.6	3	2	1	3
56	5	43.1	0.333333	53.1	36.4	2	2	1	2
77	5	10.6	0.92	31.6	23.2	3	2	3	5
77	5	18.7	0.76	38.3	28.6	3	2	3	5
77	15	30.7	0.76	46.1	31.3	2	1	1	1
77	5	45.4	0.15	54.4	36	2	1	1	1
77	15	24.4	0.62	45.6	31.3	2	1	1	1
77	15	21.8	0.777778	42.2	31.4	3	1	1	2
77	5	5.3	0.684211	23.1	18.7	3	3	3	6
77	15	12.5	0.74	35	26	3	3	1	4
77	15	58.4	0.4	66.4	32.1	1	1	1	0
77	15	57.2	0	64.2	40.6	2	1	1	1
84	5	10.1		29	24	3	3	3	6
84	15	5	0.84	23	22	4	1	1	3
84	5	51.3	0.9	58	39	2	2	2	3
84	5	45.7	0.82	52	36	2	3	3	5
84	15	7.3	0.9	28	22	3	2	2	4
84	5	14.7	0.9	35	27	3	3	3	6
84	15	10	0.88	30	21	2	3	3	5
84	15	8.5	0.814815	31	21	2	2	2	3
84	5	69.1	0.16	66	42	2	1	2	2
84	5	12.2	0.730769	34	25	3	3	3	6
97	15	11.5	0.607843	33	22	2	1	2	2
97	15	25.5	0.76	51	22	1	1	1	0
97	5	20	0.377358	38	28	3	2	1	3
97	5	11.9	0.557692	34	24	3	2	2	4
97	15	28.4	0.72	45	32	3	3	3	6
97	5	43.1	0.745098	53	34	2	3	3	5
97	5	27.3	0	44	32	3	2	2	4
97	5	8.6	0.74	33	20	2	2	2	3
97	5	21.7	0.653846	47	21	1	1	2	1
97	5	88.7	0.78	67	45	2	2	2	3
112	5	9.2	0.9	34	21	2	2	2	3
112	15	25.1	0.9	44	28	2	1	2	2
112	15	21.6	0.86	39	29	3	2	2	4
112	15	12.5	0.82	35	23	2	3	2	4
112	5	30.1	0.68	45	31	2	3	3	5
112	15	17.9	0.6	41	24	2	1	2	2
112	5	2.1	0.297297	18	14	3	3	3	6
112	5	67.6		71	34	1	1	1	0
112	15	4	0.92	20	18	4	4	3	8
112	15	11.8	0.8	35	26	3	2	2	4
112	15	100.1	0.338028	70.5	47.3	2	1	1	1
112	5	21.7	0.64	37.6	28.2	3	2	3	5
112	5	36.4	0.62	45.2	36.9	3	3	1	4
112	5	20.5	0.732143	36.6	29.8	3	2	3	5
112	5	14.8	0.7	36.4	23.7	2	1	1	1
112	5	28.1	0.58	57.4	19.4	1	1	1	0
112	5	18.1	0.7	37.8	23.6	2	2	2	3
112	5	3.8	0.68	20.3	16.8	3	3	3	6
112	15	9	0.06	34.3	18.4	2	2	2	3
112	15	22.1	0.74	41.7	30.1	3	1	1	2
127	15	10.1	0.411765	32	21	2	1	1	1
127	15	1.6		17	13	3	3	3	6
127	15	9	0.82	28	21	3	3	1	4
127	5	8.9	0.8	29	20	2	3	1	3
127	5	16	0.64	35	26	3	3	2	5
127	5	25.3	0.632653	44	23	2	2	1	2
127	5	3.1	0.56	20	16	3	2	1	3
127	15	9.8	0.74	31	18	2	1	1	1
127	5	5	0.76	26	18	2	2	3	4
127	15	12.9	0.42	36	21	2	1	1	1

## Sheet: block3_indiv
dayofseason	depth	weight	maturity	diam1	diam2	sphericity	lobularity	regular	shape
-13	15	35.2	0	45.8	34.4	3	2	1	3
-13	15	34.9	0	43.9	34.2	3	3	3	6
-13	15	24.8	0	45.7	20.8	1	2	1	1
-13	5	30	0	47.9	31.9	2	1	1	1
-13	5	24.6	0	41	30.7	3	3	2	5
-13	5	17.6	0.16	39.5	28.7	3	3	2	5
-13	15	1.9	0.34	17.6	11.9	2	4	3	6
1	5	35.2	0.02	46	32	2	1	2	2
1	15	5.7	0.02	24	19	3	3	3	6
1	15	8.5	0.02	29	19	2	3	2	4
1	5	10.2	0.38	30	21	2	1	2	2
1	5	6.5	0.12	26	21	3	2	1	3
1	15	45.1	0	45	38	3	2	1	3
1	5	6.7	0	28	17	2	3	2	4
1	5	33	0.54	49	32	2	1	1	1
20	15	29.9	0.7	50.9	29.7	2	1	1	1
20	5	41.5	0.22	48.4	34.8	3	1	2	3
20	5	13.3	0.88	36.8	22.8	2	2	1	2
20	15	72.7	0.444444	78	37.7	1	1	1	0
20	5	45.8	0.52	55.1	28	2	2	1	2
20	5	36.9	0.18	64	28	1	1	1	0
20	5	11.3	0.44	33.1	24.2	3	1	1	2
20	5	43.5	0.66	50.5	37.5	3	2	3	5
20	5	19.8	0.02	36.1	30.2	3	3	3	6
20	5	63.5	0.4	49.2	32.5	2	1	1	1
27	5	17.5	0	34.2	25.9	3	3	1	4
35	5	22.4	0.5	41.9	27.4	2	1	2	2
35	5	46.6	0.6	53.5	38.6	3	1	2	3
35	5	28.1	0.88	49.1	30.5	2	1	2	2
35	5	35.7	0.64	44.8	37.9	3	2	2	4
35	15	34.7	0.78	47	30.3	2	1	2	2
35	15	21.3	0.72	42.9	23.5	2	2	2	3
35	15	79.9	0.14	67.3	49.4	3	1	1	2
35	15	9.5	0.84	32.7	21.1	2	1	3	3
35	5	36.7	0.56	48.3	34.2	3	1	1	2
56	5	10.4	0.76	33.9	21.9	2	2	2	3
56	5	5	0.9	23.3	17	3	4	3	7
56	5	19	0.24	40.4	28.5	3	2	2	4
56	5	11.1	0	38.4	20.5	2	2	1	2
56	5	4.8	0.68	26.1	18.5	3	3	2	5
56	5	6.6	0.78	25	19.1	3	3	2	5
56	15	12.4	0.03125	33.6	21	2	3	3	5
56	15	5.2	0.392157	23.4	18.7	3	4	2	6
56	5	2.2	0.28	16.9	15	4	3	3	7
56	5	41.9	0.54902	59.2	29.9	2	1	1	1
56	5	19.2	0	41.5	27.7	2	3	1	3
56	15	56.9	0.36	54.2	43.8	3	1	2	3
56	15	6.7	0.46	25.2	21.6	4	3	3	7
56	15	58.4	0.7	61.2	39.9	2	2	1	2
56	15	26.6	0.8	40.3	30.7	3	2	3	5
56	15	24.5	0.1	41	30	3	2	3	5
56	5	75.6	0.58	59.6	36.8	2	1	1	1
56	5	31.2	0	45.4	34.8	3	1	3	4
77	5	4.3	0.9	22.3	18.3	3	2	3	5
77	5	5.3	0.157895	27.7	17.4	2	2	3	4
77	15	36.3	0.64	45.6	34.2	3	3	2	5
77	15	42.1	0.08	53	40.7	3	1	1	2
77	15	34.4	0.84	55	37.6	2	1	2	2
77	5	29.2	0.516667	43.7	36.3	3	2	3	5
77	15	16.3	0.767857	37	26.1	3	3	2	5
77	5	18.3	0.4	43.2	25.3	2	2	1	2
77	5	19.3		40	31.5	3	3	2	5
77	15	56.1	0.7	63.2	35.5	2	1	1	1
84	5	38.1	0.8	47	36	3	1	2	3
84	5	11	0.62	40	23	2	1	1	1
84	15	3.3	0.666667	21	14	2	3	3	5
84	15	30.1	0.62	46	33	3	3	2	5
84	15	15.7	0.2	36	27	3	2	1	3
84	5	6.2		27	17	2	4	3	6
84	15	6.8	0.74	28	22	3	2	2	4
84	15	16.6	0.7	34	28	3	4	3	7
84	15	8.7	0.483333	28	22	3	3	2	5
84	5	37.5	0.673077	45	36	3	3	3	6
97	15	4.9	0.52	22	19	4	4	3	8
97	15	11.7	0.82	34	25	3	3	3	6
97	5	25.3	0.84	46	31	2	2	2	3
97	5	14.9	0.94	40	22	2	2	1	2
97	5	18.2	0.68	35	29	3	3	3	6
97	5	5.4	0.96	24	20	3	4	3	7
97	5	7.9	0.18	28	20	3	3	3	6
97	15	10.3	0.272727	34	23	2	1	1	1
97	5	7.6	0.26	28	21	3	3	3	6
97	5	5.5	0.88	23	19	3	4	3	7
112	5	32.9	0.58	42.7	31.8	3	1	1	2
112	5	48.1	0.74	47.4	34	3	1	1	2
112	15	6.5	0.86	23.6	20.3	4	3	2	6
112	5	17.8	0.98	34.5	26.2	3	3	1	4
112	5	5.2	0.86	22.7	19.5	4	3	3	7
112	5	15.4	0.9	32.3	27.3	3	2	2	4
112	15	74.6	0.74	58.7	51.2	4	1	1	3
112	15	25.3	0.648148	41.3	27.4	2	1	1	1
112	5	62	0.72	56.8	44.4	3	1	1	2
112	5	6.6	0	31.9	20.7	2	1	1	1
127	5	32.7	0.86	51	39	3	1	2	3
127	5	3.3	0.84	21	15	3	3	3	6
127	5	15.2	0.5	32	25	3	3	2	5
127	5	2.8		18	15	3	3	1	4
127	15	20.5	0.78	38	29	3	3	2	5
127	5	8.2	0.58	27	21	3	3	1	4
127	15	11.1	0.88	30	26	4	4	3	8
127	15	16.7	0.82	35	27	3	3	1	4
127	5	5.9	0.92	23	22	4	2	3	6
127	5	25.6	0.62	36	33	4	3	3	7

## Sheet: block0_clusters
dayofseason	cluster_id	fruitbody_id	depth	weight	diam1	diam2	sphericity	lobularity	regular	shape
-13	548	826	15	21.7	40.5	29.9	3	3	3	6
-13	548	827	15	27.5	42.5	30.1	3	3	3	6
-13	549	828	15	26.8	42.5	28.2	2	3	3	5
-13	549	829	15	24.5	41.1	30.7	3	2	2	4
-13	552	832	15	10.5	30.3	24.1	3	3	3	6
-13	552	833	15	6.5	25.9	18.8	3	3	3	6
-13	552	834	15	4.1	20.2	16.7	3	4	3	7
-13	554	836	15	10.7	29.8	25	3	3	3	6
-13	554	837	15	10.3	28.7	23.3	3	3	3	6
-13	558	844	15	50.3	53.2	34.5	2	1	2	2
-13	558	845	15	21.3	46.6	28.6	2	2	2	3
-13	563	855	15	38.4	47.9	35.6	3	3	2	5
-13	563	856	15	14.6	34.8	28.3	3	2	2	4
-13	563	857	15	15.7	33	29.8	4	3	3	7
-13	563	858	15	14.8	35.6	28.3	3	3	2	5
-13	563	859	15	11	32	25.5	3	2	2	4
-13	563	860	15	2.5	18.9	14.4	3	3	3	6
-13	566	864	15	47.1	47.2	40	3	3	3	6
-13	566	865	15	15.4	31.9	28	4	3	3	7
-13	566	866	15	8	24.4	22	4	4	3	8
-13	567	867	15	25.5	37.3	31.6	3	3	3	6
-13	567	868	15	11.8	31.8	20.9	2	3	3	5
-13	567	869	15	5.4	24	17.5	3	4	3	7
-13	567	870	15	2.3	15.6	13.4	4	4	3	8
-13	601	915	15	67.3	63	39.6	2	3	2	4
-13	601	916	15	71	61	42	2	1	1	1
1	614	929	15	56.7	56	43	3	1	2	3
1	614	930	15	12.2	31.5	25.3	3
1	615	931	5	18.4	40.5	26.8	2	3	2	4
1	615	932	5	27.5	44.7	29.2	2	2	2	3
1	615	933	5	17	37.5	27	3
1	617	938	25	37.5	51.1	31.7	2	3	2	4
1	617	939	25	31.2	46.7	28.9	2	3	2	4
1	619	943	15	16.1	32.6	28.8	4	3	2	6
1	619	944	15	8	25	20	3	3	2	5
1	619	945	15	5.3	22	18	3	3	3	6
1	619	946	15	4.8	21	20	4	4	3	8
1	619	947	15	4.6	19	18	4	4	3	8
1	619	948	15	3.4	20	17	3	4	3	7
1	619	949	15	2.3	17	14	3	4	3	7
1	619	950	15	1.5	14	13	4	4	3	8
1	620	951	25	39.3	47.7	34	3	3	2	5
1	620	952	25	32	46.9	32.2	2	3	2	4
1	620	953	25	6.6	25.4	17.9	3	3	3	6
1	623	958	15	18.7	35	31	4	3	3	7
1	623	959	15	5.4	25	19	3	3	3	6
1	624	960	25	27.4	44.2	31.6	3	2	1	3
1	624	961	25	23.7	45.4	26.1	2	1	2	2
1	624	962	25	1.5	16.4	11.7	3	3	3	6
1	626	964	15	85.8	70.5	41	2	1	1	1
1	626	965	15	5.1	24.6	19.1	3	3	2	5
1	627	966	15	34.1	40	35	4	3	3	7
1	627	967	15	17.4	41	26	2	3	3	5
1	627	968	15	5.7	24	20	3	4	3	7
1	628	969	15	18.4	36	30	3	3	2	5
1	628	970	15	13.1	31	24	3	3	3	6
1	641	985	15	31.3	46.3	25.4	2	3	2	4
1	641	986	15	11.7	34	23	2	3	1	3
1	641	987	15	5.7	24	19	3	3	2	5
1	641	988	15	3.4	22	15	2	3	1	3
1	641	989	15	5.8	25	16	2	2	2	3
1	641	990	15	3.4	21	16	3	3	3	6
1	641	991	15	3.9	25	18	3	3	3	6
1	641	992	15	2.8	20	14	2	3	2	4
1	642	993	15	32.5	43	38	4	3	3	7
1	642	994	15	16.2	38.6	23.5	2	3	2	4
1	642	995	15	12.6	33.5	22	2	3	3	5
1	643	996	15	56.8	59	41	2	1	1	1
1	643	997	15	45.8	52.8	38	3	2	2	4
1	643	998	15	37.6	50.5	29.4	2	2	2	3
1	643	999	15	8.7	31.4	20.7	2	2	2	3
1	645	1001	15	8.7	29.6	19	2	3	3	5
1	645	1002	15	38.2	49	28.9	2	1	2	2
1	645	1003	15	7.1	25.8	17.4	2	4	3	6
1	645	1004	15	4.2	24	14.6	2	3	3	5
1	646	1005	15	38.1	50.6	38.1	3	2	3	5
1	646	1006	15	6.5	25	21.4	4	3	3	7
1	646	1007	15	4.6	22	18	3	4	3	7
1	646	1008	15	1.6	16	13	3	4	3	7
1	647	1009	5	44.1	54.6	32.4	2	3	2	4
1	647	1010	5	25.8	36.9	28.3	3	2	2	4
1	648	1011	15	36.8	44	32	3	2	2	4
1	648	1012	15	16.5	38	22	2	2	2	3
1	648	1013	15	12	37	21	2	3	2	4
1	648	1014	15	10.3	37	26	3	3	2	5
1	649	1015	15	22.7	40.4	27.4	2	2	3	4
1	649	1016	15	4.5	24.1	16.9	3	2	3	5
1	650	1017	15	15.6	43.5	27.5	2	2	1	2
1	650	1018	15	23.1	35.1	26.5	3	3	3	6
1	654	1023	15	39.4	45	37	3	3	3	6
1	654	1024	15	33.2	44	33	3	2	1	3
1	654	1025	15	16.9	37	29	3	3	3	6
1	673	1044	5	37.2	50.1	34.2	2	3	2	4
1	673	1045	5	3.2	20.7	15.6	3	3	2	5
1	676	1049	15	34.8	46.7	32.5	2	3	3	5
1	676	1050	15	31	46.8	30.3	2	2	1	2
1	676	1051	15	19.3	39.8	30.1	3	3	2	5
1	676	1052	15	14.4	35	22	2	3	3	5
1	676	1053	15	16.4	36	26	3	2	2	4
1	676	1054	15	10.9	29	22	3	3	3	6
1	676	1055	15	9.3	31	18	2	3	3	5
1	676	1056	15	5.8	28	16	2	2	2	3
1	676	1057	15	7.3	24	20	3	4	3	7
1	676	1058	15	5.5	25	18	3	2	3	5
1	678	1062	5	16.8	38	25	2	3	2	4
1	678	1063	5	16.3	35	25	3	3	2	5
1	679	1064	5	40.4	49	35	3	1	2	3
1	679	1065	5	23.3	38	31	3	3	3	6
1	679	1066	5	15.7	36	23	2	3	3	5
1	680	1067	15	32.9	48	30.5	2	2	3	4
1	680	1068	15	21.1	39.5	32.1	3	1	3	4
1	681	1069	15	46	48	39	3	1	2	3
1	681	1070	15	19	39	29	3	2	2	4
3	4	5			22	20	4	4	3	8
3	4	6			33	26	3	4	2	6
3	6	8			54	31	2	3	2	4
3	6	9			38	25	2	4	1	4
3	6	10			22	16	3	2	2	4
3	17	25			27	26	4	4	1	6
3	17	26			30	23	3	3	3	6
3	17	27			21	16	3	3	3	6
3	18	28			28	26	4	4	3	8
3	18	29			21	20	4	4	3	8
20	697	1086	15	36.5	49.7	33	2	2	3	4
20	697	1087	15	21.7	39.3	28.4	3	2	3	5
20	699	1090	15	110	72	49	2	3	1	3
20	699	1091	15	64.9	63	34	2	3	1	3
20	699	1092	15	24.2	41	29.5	3	3	2	5
20	701	1095	15	62.1	63	37	2	3	2	4
20	701	1096	15	88.8	67	47	3	2	1	3
20	701	1097	15	54.5	59	36.5	2	2	2	3
20	701	1098	15	13	35	25	3	2	3	5
20	701	1099	15	7.5	25.5	19	3	3	2	5
20	702	1100	15	30.5	41.3	32	3	2	2	4
20	702	1101	15	17.68	31.6	41	3	3	2	5
20	702	1102	15	8.48	24.5	16.8	2	3	3	5
20	702	1103	15	5.56	21.5	27	3	3	2	5
20	702	1104	15	6.78	22.4	27.24	3	3	3	6
20	702	1105	15	3.69	21.8	18.17	3	3	3	6
20	702	1106	15	0.8	11.2	10.1	4	3	3	7
20	703	1107	15	78.8	64	46	3	1	1	2
20	703	1108	15	116.5	87	41	1	1	1	0
20	704	1109	15	17.2	36.6	29.9	3	3	3	6
20	704	1110	15	13.1	34.9	24	2	2	3	4
20	704	1111	15	7.1	26.4	22.7	4	4	3	8
20	706	1114	15	98	70.57	42.8	2	2	1	2
20	706	1115	15	63.7	58.45	45.14	3	2	1	3
20	706	1116	15	10.3	33.1	19.6	2	3	1	3
20	706	1117	15	5.23	24.1	19.3	3	3	2	5
20	722	1134	5	14.6	33	26.6	3	3	3	6
20	722	1135	5	15.6	35	26.8	3	3	3	6
20	724	1138	15	32.8	47.5	31	2	3	2	4
20	724	1139	15	21.4	39.6	25.1	2	3	3	5
20	724	1140	15	19.3	38	32.1	3	3	2	5
20	726	1142	15	4.1	22.8	16.3	3	2	2	4
20	726	1143	15	24.4	46.2	29.1	2	1	1	1
20	727	1144	15	79.5	66.4	44.8	2	1	1	1
20	727	1145	15	35.8	49.3	37.6	3	1	1	2
20	747	1165	15	39	44.9	38.9	4	3	3	7
20	747	1166	15	28.5	41.4	34.4	3	3	3	6
20	747	1167	15	8	28.5	21.4	3	4	3	7
20	748	1168	15	108.5	70.1	49	2	1	2	2
20	748	1169	15	43.3	53	33	2	2	2	3
20	749	1170	15	40.1	48.3	39.9	3	1	2	3
20	749	1171	15	18.6	36	29.1	3	2	3	5
20	750	1172	25	35.6	51.8	27	2	2	2	3
20	750	1173	25	31.8	47	32.1	2	3	2	4
20	751	1174	15	22.1	37	31.1	3	3	3	6
20	751	1175	15	17.6	35.7	28.4	3	2	3	5
20	751	1176	15	15.4	26.9	30.3	4	2	2	5
20	751	1177	15	10.2	28.2	25	4	3	2	6
20	751	1178	15	8.6	29	21.2	3	3	2	5
20	751	1179	15	3.3	20	15.4	3	3	3	6
20	751	1180	15	2.5	16.6	15.1	4	4	3	8
20	752	1181	15	23.7	44.6	23.5	2	2	1	2
20	752	1182	15	7.4	29.5	19.4	2	3	3	5
20	752	1183	15	6.2	24.8	20.3	3	4	3	7
20	755	1187	25	59	53.5	38.3	3	2	1	3
20	755	1188	25	49	56.6	36.2	2	2	1	2
20	755	1189	25	24.6	43.1	24.1	2	2	1	2
20	755	1190	25	7.7	26.3	19.8	3	3	2	5
20	762	1199	5	24.4	43.2	30.7	3	2	2	4
20	762	1200	5	17	35.9	27.6	3	2	3	5
27	34	45			42.59	32.4	3	4	3	7
27	34	46			46.7	28.1	2	2	2	3
27	34	47			17.4	13.7	3	4	3	7
27	34	48			28.3	18	2	4	3	6
27	34	49			34.1	23.3	2	4	3	6
27	34	50			23.6	17.9	3	4	3	7
27	34	51			25.6	21	3	4	3	7
27	34	52			30.2	23.5	3	4	3	7
27	38	56			31	26.7	4	4	3	8
27	38	57			27.8	22.3	3	4	3	7
27	38	58			26.9	21.2	3	3	3	6
27	38	59			17.7	15	3	4	3	7
27	38	60			17.4	12.5	3	4	3	7
27	38	61			12.3	11.9	4	4	3	8
27	39	62			41.9	33.5	3	4	2	6
27	39	63			38	30.1	3	4	2	6
27	42	66			41	27.6	2	4	1	4
27	42	67			18.7	14.2	3	4	3	7
27	47	72			46.5	30.1	2	4	2	5
27	47	73			20.8	16.5	3	4	3	7
27	47	74			17.6	15.24	4	4	3	8
27	47	75			17	13	3	4	3	7
27	48	76			42.9	36.2	3	3	3	6
27	48	77			28.8	18.4	2	3	3	5
27	51	80			52.8	34.9	2	2	2	3
27	51	81			37.7	27.3	3	2	2	4
27	53	83			55.9	36.1	2	4	2	5
27	53	84			40.1	30.1	3	3	2	5
27	55	86			29.1	28.1	4	4	3	8
27	55	87			29	22.2	3	4	3	7
27	55	88			27.3	21.8	3	4	3	7
27	55	89			15.3	14.7	4	4	3	8
27	55	90			15.1	12.5	3	4	3	7
27	62	97			34.2	25.6	3	4	3	7
27	62	98			32.6	26.9	3	4	3	7
27	62	99			29.6	27.8	4	4	3	8
27	62	100			26.6	19.2	3	4	3	7
27	62	101			25.4	21.1	3	4	3	7
27	64	103			46.4	27.3	2	4	3	6
27	64	104			32.5	24.8	3	3	3	6
27	65	105			38.9	21	2	2	2	3
27	65	106			28.3	20.2	3	3	3	6
27	65	107			29.4	21.1	3	3	3	6
27	65	108			26.5	19	3	3	2	5
27	65	109			24.1	15	2	2	1	2
27	65	110			29.9	15.4	2	4	2	5
27	65	111			17.1	10.6	2	3	2	4
27	65	112			14.2	11	3	4	3	7
27	66	113			42.6	34.7	3	3	3	6
27	66	114			17.8	9.2	2	4	3	6
27	70	118			47	33.3	3	4	3	7
27	70	119			43.7	34.5	3	3	3	6
27	76	128			49.4	40.4	3	4	2	6
27	76	129			35.3	27	3	4	3	7
27	76	130			32.1	21.9	2	4	3	6
27	76	131			28.9	19.7	2	4	3	6
27	81	143			40.8	27.7	2	3	2	4
27	81	144			28.8	22.5	3	3	3	6
27	81	145			21.4	18.2	4	3	3	7
27	83	147			18.4	13.7	3	4	3	7
27	83	148			15.8	12.1	3	4	3	7
27	88	155			24.8	23.1	4	4	2	7
27	88	156			29	23.4	3	4	3	7
27	89	157			46.6	30.5	2	3	3	5
27	89	158			38.1	30	3	4	3	7
27	89	159			30.1	24.5	3	4	3	7
27	89	160			25.8	21.1	3	4	3	7
27	91	162			23.8	20.3	4	4	3	8
27	91	163			24.8	21.3	4	4	3	8
27	91	164			20.3	14.7	3	4	3	7
27	91	165			17.3	15.2	4	4	3	8
27	92	166			41.2	34.7	3	4	3	7
27	92	167			23.4	19.4	3	4	3	7
27	92	168			23.6	21.9	4	4	3	8
27	94	170			24.2	20.2	3	3	2	5
27	94	171			23	18.8	3	3	3	6
27	94	172			19.8	17	4	3	3	7
27	97	175			49.4	32.2	2	2	2	3
27	97	176			28.4	18.2	2	3	2	4
35	778	1216	15	37	52	28	2	2	2	3
35	778	1217	15	40	52.5	33.8	2	1	2	2
35	778	1218	15	18	36.6	28.4	3	2	2	4
35	779	1219	15	27.6	47	32	2	2	3	4
35	779	1220	15	22	38.5	31.3	3	2	2	4
35	780	1221	15	22.2	38	30.5	3	3	3	6
35	780	1222	15	10.5	29.6	24.5	3	4	3	7
35	780	1223	15	9	27.6	23.3	3	3	3	6
35	780	1224	15	7.5	25.7	24	4	3	3	7
35	780	1225	15	5.2	23.3	19.5	3	3	3	6
35	780	1226	15	4.7	21.5	20	4	4	3	8
35	780	1227	15	2.5	17.2	16.6	4	4	3	8
35	781	1228	15	28.8	42.6	34	3	3	3	6
35	781	1229	15	24.4	39.3	29.3	3	4	3	7
35	781	1230	15	16.6	33.8	29	4	4	3	8
35	781	1231	15	10.2	28.9	24.6	4	3	3	7
35	781	1232	15	9.7	29.7	21.2	3	3	3	6
35	781	1233	15	7.2	25.9	20.8	3	4	3	7
35	781	1234	15	6.6	26.7	20.7	3	4	3	7
35	782	1235	15	7.5	26.3	22.5	4	3	3	7
35	782	1236	15	8.3	25.8	22.9	4	3	3	7
35	782	1237	15	7.2	25.4	22	4	4	3	8
35	782	1238	15	6.7	24.8	20.8	3	3	3	6
35	782	1239	15	5	22.8	19	3	3	3	6
35	782	1240	15	6.3	23.1	23.1	4	4	3	8
35	782	1241	15	1.7	16.2	14.1	4	3	3	7
35	784	1245	15	49.5	49.6	42.7	4	3	3	7
35	784	1246	15	22.8	37.7	34.2	4	4	3	8
35	785	1247	25	35	52	34.6	2	2	3	4
35	785	1248	25	39.2	53	36	2	3	2	4
35	786	1249	15	118.3	73.9	51.2	2	2	1	2
35	786	1250	15	77	60.5	45.9	3	2	2	4
35	786	1251	15	43	49.5	37.1	3	3	3	6
35	786	1252	15	7.8	28.4	21.7	3	3	3	6
35	787	1253	15	25.8	29.2	31.9	4	2	2	5
35	787	1254	15	22.1	43.5	26.8	2	3	1	3
35	787	1255	15	26.9	43.8	30.9	3	2	2	4
35	787	1256	15	21.8	41.4	27.1	2	3	3	5
35	787	1257	15	11.7	32.1	25.2	3	3	3	6
35	787	1258	15	9.3	32.5	20	2	2	2	3
35	789	1261	5	38	48.5	34.6	3	3	2	5
35	789	1262	5	6.5	24.8	19.8	3	3	3	6
35	789	1263	5	4.2	22.8	17.8	3	3	3	6
35	790	1264	15	52.6	61.4	40.4	2	1	1	1
35	790	1265	15	34.6	50	33	2	1	1	1
35	790	1266	15	25.8	47.8	28.2	2	1	1	1
35	790	1267	15	15.9	36.5	26.2	3	1	1	2
35	790	1268	15	15.2	45.2	19.7	1	2	1	1
35	790	1269	15	12.7	32.8	26.3	3	2	2	4
35	812	1293	15	33.1	50.8	34.1	2	2	1	2
35	812	1294	15	10.1	31.6	22.6	3	2	2	4
35	812	1295	15	2.4	19.8	13.7	2	3	3	5
35	815	1301	15	55.7	53.3	43.4	3	2	2	4
35	815	1302	15	13.5	31.2	25.5	3	2	3	5
35	826	1315	15	99.2	70.7	44.8	2	1	1	1
35	826	1316	15	3.9	27.5	15	2	2	1	2
35	848	1340	15	13.3	36	24	2	2	2	3
35	848	1341	15	10.6	32	24	3	3	3	6
35	848	1342	15	8.3	32	20	2	2	2	3
35	848	1343	15	8	29	19	2	2	3	4
35	851	1347	15	78.2	67.6	43	2	2	1	2
35	851	1348	15	42.7	63.1	33.9	2	3	2	4
35	851	1349	15	40.7	46.8	37.5	3	2	2	4
35	851	1350	15	36.7	44.8	30.2	2	3	2	4
35	851	1351	15	13	32.7	24.7	3	3	3	6
35	851	1352	15	21	47.9	22.9	1	3	2	3
35	851	1353	15	22.8	37.5	33.8	4	3	3	7
35	851	1354	15	10.9	31.6	21.4	2	3	2	4
35	851	1355	15	6.5	25.9	21.5	3	3	3	6
35	851	1356	15	5.4	24.1	18.6	3	3	3	6
35	851	1357	15	0.4	11.1	9.1	3	3	2	5
35	854	1362	15	112.3	71.5	45.7	2	2	2	3
35	854	1363	15	61.9	57	38.5	2	3	2	4
35	857	1366	15	15	32.9	23.1	3	2	2	4
35	857	1367	15	12.1	32.7	23.6	3	3	2	5
35	861	1373	15	12.2	31.8	23.8	3	3	3	6
35	861	1374	15	10	32.4	22.7	3	3	2	5
35	861	1375	15	7.5	28.3	19.9	3	3	3	6
35	866	1382	25	28.6	42	32.5	3	2	3	5
35	866	1383	25	20	40.9	25.7	2	2	1	2
35	866	1384	25	9.5	28.4	24.7	4	3	3	7
35	868	1386	25	19.3	37.9	28	3	1	2	3
35	868	1387	25	1.8	13.2	13.6	4	3	3	7
56	117	199	15		49.8	33	2	3	2	4
56	117	200	15		42.7	36.8	4	3	2	6
56	122	206	15		54.7	39.9	3	3	3	6
56	122	207	15		53.2	39.8	3	3	2	5
56	122	208	15		44.4	25.8	2	3	2	4
56	123	209	15		55.2	35.5	2	2	2	3
56	123	210	15		47.4	29.9	2	3	2	4
56	123	211	15		29.3	25.2	4	4	3	8
56	123	212	15		25.5	22.8	4	4	3	8
56	123	213	15		25.9	20.9	3	3	3	6
56	123	214	15		20.2	15.5	3	3	2	5
56	125	216	15		38	27.6	3	2	2	4
56	125	217	15		39.2	22	2	4	2	5
56	125	218	15		30.2	17.3	2	3	2	4
56	125	219	15		28.2	19.5	2	3	3	5
56	125	220	15		29.4	26.2	4	3	2	6
56	129	226	15		41.4	36.9	4	4	3	8
56	129	227	15		33.7	25.8	3	4	3	7
56	129	228	15		28.4	22.2	3	4	3	7
56	129	229	15		23	21.1	4	4	3	8
56	130	230	15		48.3	32.5	2	2	2	3
56	130	231	15		44.9	36	3	3	2	5
56	133	234	15		37.4	27.2	3	2	1	3
56	133	235	15		22.4	15.2	2	4	3	6
56	133	236	15		24.4	16.9	2	4	3	6
56	134	237	15		33	25	3	2	2	4
56	134	238	15		30.8	20.9	2	3	2	4
56	134	239	15		25.3	16.9	2	4	3	6
56	135	240	15		39	27.5	3	1	1	2
56	135	241	15		31.2	16.6	2	3	2	4
56	135	242	15		28.1	24.7	4	3	1	5
56	135	243	15		23.6	18.9	3	3	1	4
56	135	244	15		21.3	13.2	2	3	1	3
56	136	245	5		29.8	25.1	3	4	3	7
56	136	246	5
56	136	247	5
56	136	248	5
56	136	249	5
56	136	250	5
56	136	251	5
56	136	252	5
56	136	253	5
56	136	254	5
56	136	255	5
56	136	256	5
56	136	257	5
56	136	258	5
56	136	259	5
56	136	260	5
56	136	261	5		14.9	13.3	4	4	3	8
56	137	262	15		35.3	30.22	4	4	3	8
56	137	263	15		27.1	22.1	3	4	3	7
56	139	265	15		34.3	17.9	2	3	3	5
56	139	266	15		28	21.4	3	4	2	6
56	139	267	15		21.8	18.3	3	4	3	7
56	139	268	15		21.1	15.1	3	4	3	7
56	139	269	15		19.4	13.1	2	4	2	5
56	140	270	15		44.6	35.1	3	4	3	7
56	140	271	15		42.3	31.3	3	4	3	7
56	140	272	15		36.9	30.6	3	4	3	7
56	140	273	15		29.3	24	3	4	3	7
56	140	274	15		23.1	21.5	4	4	3	8
56	144	279	15		31.4	23.7	3	4	2	6
56	144	280	15		23.5	18.2	3	4	2	6
56	145	281	15		32.2	27.8	4	4	3	8
56	145	282	15
56	145	283	15
56	145	284	15
56	145	285	15
56	145	286	15
56	145	287	15
56	145	288	15
56	145	289	15		15.5	15	4	4	3	8
56	146	290	5		49.2	33.2	2	1	1	1
56	146	291	5		38.5	21.4	2	2	1	2
56	146	292	5		16.6	9.4	2	3	1	3
56	894	1414	15	15.8	35.8	27	3	3	3	6
56	894	1415	15	15.7	37.4	25.9	2	2	1	2
56	894	1416	15	9.7	25.7	25.3	4	2	3	6
56	894	1417	15	8.5	28.2	22.2	3	3	3	6
56	894	1418	15	6	28	19.4	2	3	2	4
56	894	1419	15	5.9	24	20.8	4	3	3	7
56	894	1420	15	5.5	24.1	19	3	4	3	7
56	900	1426	15	14	34.7	27	3	3	2	5
56	900	1427	15	10	31.1	21.5	2	3	2	4
56	900	1428	15	6.5	26.7	19	3	3	3	6
56	900	1429	15	2.3	17.7	15.1	4	3	3	7
56	901	1430	15	103.5	72.4	41.2	2	1	2	2
56	901	1431	15	54.8	55.7	39.9	3	1	2	3
56	908	1445	15	25.6	40	29.6	3	1	2	3
56	908	1446	15	13.3	33	24	3	3	3	6
56	908	1447	15	9.2	29.2	22.7	3	2	3	5
56	908	1448	15	10.8	30.7	23.4	3	1	3	4
56	908	1449	15	4.9	24.6	17.4	3	3	3	6
56	915	1457	15	7.7	29.2	20.9	3	2	1	3
56	915	1458	15	2.6	18	13.3	3	3	3	6
56	151	300	15		37.1	24	2	2	1	2
56	151	301	15		26.4	17.9	2	4	3	6
56	153	303	15		36.3	30.7	3	2	2	4
56	153	304	15		22.6	20.9	4	4	3	8
56	155	306	15		50.9	33.3	2	3	2	4
56	155	307	15		35.7	23.5	2	4	3	6
56	155	308	15		30.5	21.8	3	4	3	7
56	157	310	15		42.9	29.5	2	3	2	4
56	157	311	15		29.4	17.6	2	2	2	3
56	921	1465	15	103.5	68	53	3	1	1	2
56	921	1466	15	47.3	55.4	30	2	1	1	1
56	921	1467	15	48.5	55.5	36	2	3	1	3
56	927	1477	25	15	34.5	26.7	3	3	3	6
56	927	1478	25	10	30.9	22.7	3	3	3	6
56	927	1479	25	10.3	33.1	21.6	2	3	1	3
56	933	1485	15	36.1	44.6	35.2	3	3	3	6
56	933	1486	15	33	49.5	33.9	2	3	1	3
56	935	1488	15	38.4	48.9	31.6	2	2	2	3
56	935	1489	15	3	22.2	15	2	3	3	5
56	936	1490	15	73.7	64.5	37	2	1	1	1
56	936	1491	15	12.8	37.5	20.5	2	3	1	3
56	946	1504	15	14.7	32.8	27.4	3	3	2	5
56	946	1505	15	10.1	28.1	24	4	4	3	8
56	946	1506	15	10.6	29.5	23.8	3	3	3	6
56	946	1507	15	7.4	28.5	19.3	2	3	3	5
56	946	1508	15	11	30.8	23.7	3	3	3	6
56	947	1509	15	33.6	48	32.3	2	2	3	4
56	947	1510	15	5.5	27.3	17.6	2	3	2	4
56	947	1511	15	1.7	17.9	12.3	2	3	3	5
56	170	325	5		44.8	26.7	2	4	3	6
56	170	326	5		29.8	23.5	3	4	3	7
56	171	327	15		39.9	32.1	3	3	3	6
56	171	328	15		39.7	30.1	3	3	2	5
56	173	330	15		39.7	26.15	2	4	2	5
56	173	331	15		31.9	25.4	3	4	2	6
56	173	332	15		19.1	18	4	4	3	8
56	952	1519	15	71.6	50.6	37.5	3	1	1	2
56	952	1520	15	13.5	40.6	26.6	2	3	1	3
56	954	1522	15	30.8	44.6	31.9	3	1	2	3
56	954	1523	15	12.6	33.4	26.4	3	3	3	6
56	954	1524	15	7.7	29.8	19.9	2	2	2	3
56	954	1525	15	7.4	27.8	20.7	3	2	3	5
56	954	1526	15	4.4	20.9	18.9	4	4	3	8
56	954	1527	15	5.6	24.5	20.3	3	4	3	7
56	954	1528	15	6.6
56	955	1529	15	19.3	36.7	28.4	3	2	2	4
56	955	1530	15	14.2	38.5	21.9	2	1	2	2
56	955	1531	15	4.5	21.4	18	3	3	3	6
56	955	1532	15	3.6	23.1	15.5	2	3	2	4
56	955	1533	15	1.6	16.8	11.4	2	3	2	4
56	958	1539	5	27.3	41.6	32.4	3	3	1	4
56	958	1540	5	5	22.6	18.8	3	3	3	6
56	958	1541	5	2	17.8	13.8	3	3	2	5
56	958	1542	5	1	25.8	11.1	1	3	2	3
56	961	1545	15	25	40.9	31.6	3	3	3	6
56	961	1546	15	23.2	40.1	31.6	3	2	2	4
56	961	1547	15	4.3	22.7	17	3	3	2	5
56	968	1554	15	28.9	43.5	34.6	3	1	3	4
56	968	1555	15	5	23.3	19.1	3	2	3	5
56	969	1556	5	7.7	26.7	20.3	3	2	2	4
56	969	1557	5	6.3	27.5	16.8	2	2	2	3
56	969	1558	5	4.9	24.8	18.2	3	2	2	4
56	969	1559	5	0.5	11.6	8.4	3	2	2	4
77	1012	1602	15	37.1	50.5	34.1	2	2	3	4
77	1012	1603	15	34.5	51.2	34.4	2	2	2	3
77	1012	1604	15	20.6	39.1	28.8	3	2	2	4
77	1012	1605	15	6.4	26	19.5	3	3	3	6
77	1012	1606	15	3	19.1	15	3	3	3	6
77	1012	1607	15	1	12.2	8.2	2	3	3	5
77	1015	1616	25	16.9	38.1	23.8	2	1	2	2
77	1015	1617	25	7.8	30.3	19	2	3	3	5
77	1016	1618	15	18.4	41.1	28.8	3	1	2	3
77	1016	1619	15	8.9	32.2	22.7	3	3	2	5
77	1018	1623	25	24.3	44.1	31.6	3	2	2	4
77	1018	1624	25	16.1	40.4	22	2	1	1	1
77	1018	1625	25	14.2	33.5	27.4	3	3	2	5
77	1018	1626	25	4.1	22	18.2	3	3	2	5
77	1020	1630	35	54.9	56.1	36.1	2	1	1	1
77	1020	1631	35	29.7	43.9	32	3	1	3	4
77	1022	1634	5	42	51.6	41	3	2	2	4
77	1022	1635	5	37.6	50.4	32.3	2	2	2	3
77	1022	1636	5	18.3	41.5	27.1	2	2	3	4
77	1022	1637	5	2.7	20.8	14	2	2	2	3
77	1022	1638	5	1.9	15.7	11	3	3	3	6
77	1023	1639	15	23.8	43.3	31.4	3	2	1	3
77	1023	1640	15	7.4	28.8	21.5	3	3	3	6
77	1025	1649	15	28.3	44.9	35	3	2	3	5
77	1025	1650	15	8	27.2	21.8	3	4	3	7
77	1025	1651	15	7.7	29.2	20.9	3	2	3	5
77	1025	1652	15	2.6	18.8	14.1	3	3	3	6
77	1025	1653	15	1.8	16.3	13.4	3	4	3	7
77	1026	1654	15	71.7	57.8	44.3	3	3	3	6
77	1026	1655	15	19.2	36.2	29.7	3	3	3	6
77	1027	1656	15	39.8	42.3	35.5	3	2	3	5
77	1027	1657	15	32.5	51.3	32.2	2	2	3	4
77	1028	1658	15	99.7	69.9	46.3	2	1	2	2
77	1028	1659	15	117.1	76.4	43.8	2	1	2	2
77	1045	1679	25	53.6	56.7	37.1	2	2	1	2
77	1045	1680	25	25.1	42.7	32.4	3	1	1	2
77	1047	1683	15	12.8	34.7	25.6	3	2	3	5
77	1047	1684	15	5	25.9	17.6	2	2	3	4
77	1050	1687	15	16	40.3	21.1	2	2	1	2
77	1050	1688	15	4.8	23.2	18.9	3	3	3	6
77	1054	1692	15	9.7	28.9	23.9	3	1	2	3
77	1054	1693	15	6.7	28.4	19.8	2	2	3	4
77	1079	1718	15	19.7	38.2	29.1	3	2	3	5
77	1079	1719	15	2.2	16.5	15	4	4	3	8
77	1081	1722	15	6.6	26.8	19.1	3	3	3	6
77	1081	1723	15	2.8	18.5	16.3	4	4	3	8
77	1083	1726	25	50.1	56.2	36.7	2	2	1	2
77	1083	1727	25	13.5	33.7	24.9	3	3	3	6
84	190	351	15		33	26	3	2	3	5
84	190	352	15		31	19	2	3	2	4
84	191	353	5		30	25	3	3	1	4
84	191	354	5		25	21	3	3	2	5
84	191	355	5		20	14	2	3	1	3
84	195	359	15		35	29	3	4	3	7
84	195	360	15		26	22	3	4	3	7
84	195	361	15		16	14	4	4	3	8
84	196	362	15		26	23	4	4	3	8
84	196	363	15		16	12	3	4	3	7
84	196	364	15		13	12	4	4	3	8
84	196	365	15		15	13	4	4	3	8
84	202	376	5		44	28	2	3	3	5
84	202	377	5		45	29	2	3	3	5
84	205	380	15		55	39	3	3	3	6
84	205	381	15		39	32	3	4	3	7
84	207	383	5		39	30	3	3	3	6
84	207	384	5		39	30	3	3	3	6
84	207	385	5		29	23	3	4	3	7
84	207	386	5		21	18	4	4	3	8
84	209	388	15		69	47	2	3	3	5
84	209	389	15		52	38	3	3	3	6
84	211	391	15		59	35	2	3	3	5
84	211	392	15		37	26	3	3	3	6
84	211	393	15		34	29	4	4	3	8
84	213	395	15		75	44	2	2	1	2
84	213	396	15		55	36	2	2	1	2
84	217	400	15		38	29	3	2	2	4
84	217	401	15		23	18	3	4	3	7
84	222	407	15		37	31	3	4	3	7
84	222	408	15		33	30	4	4	3	8
84	222	409	15		23	18	3	4	3	7
84	223	410	5
84	223	411	5
84	223	412	5
84	223	413	5
84	241	431	15		65	43	2	3	3	5
84	241	432	15		30	21	2	3	3	5
84	241	433	15		22	19	4	4	3	8
84	242	434	15		36	28	3	3	3	6
84	242	435	15		21	19	4	4	3	8
84	248	442	15		45	33	3	3	3	6
84	248	443	15		35	25	3	3	3	6
84	248	444	15		30	23	3	2	3	5
84	248	445	15		33	15	1	3	3	4
84	248	446	15		17	10	2	3	3	5
84	248	447	15		15	12	3	3	3	6
84	267	466	5		37	30	3	3	3	6
84	267	467	5		25	22	4	4	3	8
97	293	496	15		39	32	3	3	3	6
97	293	497	15		30	23	3	3	3	6
97	294	498	15		36	27	3	4	3	7
97	294	499	15		23	20	4	4	3	8
97	294	500	15		23	17	3	4	3	7
97	294	501	15		13	11	3	4	3	7
97	294	502	15		41	29	3	3	3	6
97	294	503	15		26	23	4	4	3	8
97	294	504	15		37	25	2	3	3	5
97	294	505	15		26	24	4	4	3	8
97	294	506	15		26	20	3	4	3	7
97	294	507	15		28	23	3	3	3	6
97	294	508	15		27	22	3	4	3	7
97	294	509	15		26	23	4	4	3	8
97	294	510	15		18	17	4	4	3	8
97	294	511	15		18	16	4	4	3	8
97	294	512	15		13	11	3	4	3	7
97	297	518	25		43	35	3	3	3	6
97	297	519	25		36	24	2	2	2	3
97	298	520	5		35	28	3	3	2	5
97	298	521	5		41	27	2	2	1	2
97	299	522	25		38	29	3	3	3	6
97	299	523	25		39	28	3	3	2	5
97	301	525	15		32	25	3	4	3	7
97	301	526	15		34	27	3	3	3	6
97	301	527	15		34	27	3	3	3	6
97	301	528	15		33	29	4	4	3	8
97	301	529	15		38	27	3	3	3	6
97	302	530	35		42	25	2	4	3	6
97	302	531	35		46	27	2	3	3	5
97	304	533	5		43	30	2	4	3	6
97	304	534	5		30	26	4	4	3	8
97	306	536	5		29	23	3	4	3	7
97	306	537	5		41	28	2	3	3	5
97	328	559	15		41	24	2	2	2	3
97	328	560	15		27	16	2	4	3	6
97	330	563	15		53	40	3	3	2	5
97	330	564	15		25	20	3	4	3	7
97	330	565	15		23	16	2	4	3	6
97	338	575	15		33	24	3	4	3	7
97	338	576	15		26	22	3	4	3	7
97	338	577	15		17	16	4	4	3	8
97	346	583	5		34	27	3	2	3	5
97	346	584	5		27	22	3	3	3	6
97	346	585	5		19	14	3	4	3	7
97	373	618	5		39	29	3	3	3	6
97	373	619	5		38	29	3	4	3	7
112	396	646	15		47	41	4	2	3	6
112	396	647	15		44	36	3	2	3	5
112	396	648	15		44	29	2	2	2	3
112	399	651	15		45	32	3	3	3	6
112	399	652	15		36	25	2	3	3	5
112	422	677	15		32	27	3	3	2	5
112	422	678	15		28	22	3	3	3	6
112	1142	1788	15	6.2	28.1	17.9	2	2	1	2
112	1142	1789	15	5.9	26.9	19.3	3	3	2	5
112	1145	1792	15	58.7	57.3	39.5	2	2	1	2
112	1145	1793	15	13.9	35.8	27.5	3	3	2	5
112	1157	1805	15	65	53.7	44.3	3	3	2	5
112	1157	1806	15	16.8	34.2	27.5	3	3	2	5
112	1185	1834	15	29.1	42.2	33.3	3	2	2	4
112	1185	1835	15	12	34.4	22.3	2	2	2	3
112	1185	1836	15	5.2	20.8	18.4	4	3	3	7
112	1186	1837	15	30.3	43.5	30.5	3	3	3	6
112	1186	1838	15	7.4	25.2	19.1	3	3	2	5
127	443	703	15		55	35	2	4	3	6
127	443	704	15		44	37	3	4	3	7
127	443	705	15		35	24	2	4	3	6
127	443	706	15		32	23	3	4	3	7
127	443	707	15		29	25	4	4	3	8
127	443	708	15		24	23	4	4	3	8
127	443	709	15		20	20	4	4	3	8
127	443	710	15		19	19	4	4	3	8
127	443	711	15		19	13	2	4	3	6
127	446	717	25		36	29	3	3	3	6
127	446	718	25		31	22	3	3	3	6
127	446	719	25		27	26	4	3	3	7
127	451	724	25		36	25	2	3	3	5
127	451	725	25		36	30	3	3	3	6
127	455	729	15		50	36	3	3	3	6
127	455	730	15		34	26	3	4	3	7
127	477	754	15		36	31	4	3	3	7
127	477	755	15		12	10	3	3	3	6

## Sheet: block1_cluster
dayofseason	cluster_id	fruitbody_id	depth	weight	diam1	diam2	sphericity	lobularity	regular	shape
-13	555	838	5	10.7	44	17.8	1	2	1	1
-13	555	839	5	17.9	40.5	23.9	2	3	2	4
-13	555	840	5	5.5	30.3	12.7	1	1	1	0
-13	557	842	5	29.1	48.9	30.6	2	2	2	3
-13	557	843	5	8.5	28.1	21.9	3	3	2	5
-13	559	846	5	20	38.1	24.8	2	1	2	2
-13	559	847	5	16.3	39.1	21	2	1	1	1
-13	559	848	5	4.1	22.3	14.6	2	1	1	1
-13	561	850	5	12.7	30.2	22.7	3	4	3	7
-13	561	851	5	4.3	20.2	16.6	3	4	3	7
-13	561	852	5	1.5	14.6	7.9	2	3	2	4
-13	562	853	5	33.3	61	35	2
-13	562	854	5	11.2	33	19	2	3	3	5
-13	565	862	15	8.9	33.5	19.4	2	3	2	4
-13	565	863	15	10.2	35.4	23.3	2	2	1	2
-13	569	872	15	28.8	51	26	2	1	1	1
-13	569	873	15	15.1	26.5	24.1	4	2	1	4
-13	579	883	5	12.8	34	22	2	2	2	3
-13	579	884	5	7.8	26	23	4	4	2	7
1	616	934	5	47.6	51	38.8	3	1	2	3
1	616	935	5	33.9				1	1
1	616	936	5	8.1				4	3
1	616	937	5	3.8				3	3
1	618	940	5	10.2	29.8	22	3	3	3	6
1	618	941	5	6.4	27.6	19	2	2	1	2
1	618	942	5	5.2	26.6	18.1	2	3	2	4
1	621	954	5	38.3	50.4	36.1	3	1	1	2
1	621	955	5	20.3	46.5	29.4	2	1	1	1
1	622	956	15	19.8	40.7	25	2	1	1	1
1	622	957	15	18	41.6	25	2	1	1	1
20	698	1088	15	3.9	25.4	14.7	2	2	2	3
20	698	1089	15	43.5	56.3	30.6	2	2	1	2
20	700	1093	5	16.1	35.2	31.2	4	2	2	5
20	700	1094	5	2.3	19.4	14	3	3	3	6
20	705	1112	5	26.1	40.8	33.3	3	3	3	6
20	705	1113	5	19.9	38.3	29.4	3	3	2	5
35	783	1242	15	25	44.5	32	3	2	1	3
35	783	1243	15	23.6	47.6	26.5	2	1	1	1
35	783	1244	15	3.1	21	15.5	3	3	2	5
35	788	1259	5	12.6	37.3	25.8	2	3	3	5
35	788	1260	5	6.7	24.5	20.8	3	3	3	6
35	792	1271	15	58.5	57.3	35.5	2	3	2	4
35	792	1272	15	14	35.6	23.1	2	3	2	4
56	115	196	5		19.3	14.5	3	4	3	7
56	115	197	5		16.7	14.7	4	4	3	8
56	118	201	15		43	37.9	4	1	1	3
56	118	202	15		27.3	20.4	3	2	2	4
56	126	221	15		30.5	24.1	3	4	2	6
56	126	222	15		23	22.9	4	4	3	8
56	126	223	15		20.2	16.8	3	3	3	6
56	143	277	15		45.2	39.2	4	1	2	4
56	143	278	15		33.1	22.9	2	3	2	4
56	889	1408	15	24.1	42.5	21.6	2	3	2	4
56	889	1409	15	14.9	33.6	25	3	2	2	4
56	903	1433	15	14.7	33	26.8	3	3	3	6
56	903	1434	15	16.9	35.9	27.7	3	2	3	5
56	903	1435	15	13.7	38	22.8	2	3	1	3
56	903	1436	15	4.1	21.3	16.1	3	3	3	6
56	903	1437	15	3.6	21	17.1	3	3	3	6
56	903	1438	15	1.3	14.5	12.4	4	3	3	7
56	903	1439	15	3.7	27.2	16	2	2	2	3
56	907	1443	5	4.6	24.1	16.5	2	2	2	3
56	907	1444	5	5.9	24.6	20.9	3	3	2	5
77	1013	1608	15	11.2	31.9	25.5	3	2	3	5
77	1013	1609	15	8.8	30.9	22.2	3	1	2	3
77	1013	1610	15	6.2	28	21.8	3	2	2	4
77	1013	1611	15	1	16.6	8.2	1	4	3	5
77	1013	1612	15	0.6	11	8.7	3	3	3	6
77	1013	1613	15	0.2	8.8	7.2	3	3	3	6
77	1014	1614	15	15	36.2	21.8	2	2	3	4
77	1014	1615	15	4.2	25.6	15.8	2	1	1	1
77	1017	1620	15	9	30.5	21.8	3	3	2	5
77	1017	1621	15	2.3	17.5	16.1	4	3	3	7
77	1017	1622	15	2.3	18.8	14.4	3	2	3	5
77	1019	1627	15	34.9	44.1	35.5	3	2	2	4
77	1019	1628	15	3.8	21.8	18.5	3	3	3	6
77	1019	1629	15	1.3	14.5	12.8	4	3	3	7
77	1021	1632	5	37.1	52.2	33.3	2	1	1	1
77	1021	1633	5	8	29.9	22.6	3	3	2	5
77	1024	1641	15	35.5	48.8	34.7	3	1	2	3
77	1024	1642	15	24.7	43.7	33.5	3	2	1	3
77	1024	1643	15	22.9	48.9	27.6	2	2	1	2
77	1024	1644	15	18.6	39.3	25.5	2	1	2	2
77	1024	1645	15	8.5	28.9	20.8	3	1	2	3
77	1024	1646	15	6.4	27.6	19.3	2	3	2	4
77	1024	1647	15	2.2	20.7	12.3	2	3	2	4
77	1024	1648	15	0.8	12.8	10.3	3	4	3	7
84	189	349	5		43	35	3	3	3	6
84	189	350	5		22	19	4	4	3	8
84	197	366	5		44	41	4	3	3	7
84	197	367	5		31	25	3	4	3	7
84	197	368	5		31	26	3	3	3	6
84	198	369	5		40	38	4	2	2	5
84	198	370	5		44	31	3	2	2	4
84	198	371	5		24	19	3	4	3	7
84	201	374	15		35	23	2	2	2	3
84	201	375	15		21	18	4	3	3	7
84	219	403	5		40	38	4	3	3	7
84	219	404	5		44	35	3	2	3	5
97	295	513	15		44	24	2	2	1	2
97	295	514	15		46	27	2	3	2	4
97	295	515	15		34	24	3	2	1	3
97	296	516	5		22	15	2	3	3	5
97	296	517	5		17	16	4	3	3	7
112	395	641	15		34	22	2	3	2	4
112	395	642	15		34	22	2	2	2	3
112	395	643	15		29	22	3	3	2	5
112	395	644	15		30	19	2	3	2	4
112	395	645	15		19	17	4	2	2	5
112	1110	1754	5	5.5	28.3	16.3	2	1	2	2
112	1110	1755	5	5.1	24.1	16.8	2	3	2	4
112	1110	1756	5	2.2	24.5	11.2	1	2	2	2
127	442	701	15		25	18	3	3	2	5
127	442	702	15		30	22	3	2	1	3
127	444	712	15		31	28	4	4	3	8
127	444	713	15		25	19	3	3	3	6
127	445	714	15		31	21	2	3	3	5
127	445	715	15		27	17	2	3	3	5
127	445	716	15		23	21	4	4	3	8
127	456	731	15		25	19	3	3	2	5
127	456	732	15		23	16	2	3	2	4
127	461	737	5		34	24	3	2	3	5
127	461	738	5		22	17	3	2	2	4

## Sheet: block2_cluster
dayofseason	cluster_id	fruitbody_id	depth	weight	diam1	diam2	sphericity	lobularity	regular	shape
-13	592	897	5	17.8	34.5	31	4	3	3	7
-13	592	898	5	9.2	31.8	19.3	2	3	3	5
-13	592	899	5	10.1	31.4	22.6	3	3	2	5
-13	592	900	5	6.2	26.5	18.6	3	2	2	4
-13	592	901	5	4.5	21.6	19	4	4	3	8
-13	592	902	5	2.7	21.2	14.5	2	2	2	3
-13	592	903	5	0.34	9	8	4	2	2	5
-13	594	905	15	55	56.2	36.6	2	2	2	3
-13	594	906	15	23.4	43.3	28.2	2	1	2	2
-13	594	907	15	23.3	40.1	28	2	2	2	3
-13	594	908	15	1.3	14.3	12.7	4	4	3	8
1	639	981	5	24	40	28.2	3	2	1	3
1	639	982	5	19.7	34	27	3	3	2	5
1	640	983	5	41.4	48	36.8	3	2	2	4
1	640	984	5	19.7	39	30.7	3	2	2	4
1	652	1020	15	11.6	33	25	3	2	2	4
1	652	1021	15	6.4	25	22	4	3	2	6
3	1	1			49	29	2	2	2	3
3	1	2			35	10	1	1	1	0
3	7	11			45	21	1	2	2	2
3	7	12			30	14	1	3	3	4
3	8	13			57	27	1	1	1	0
3	8	14			40	22	2	2	2	3
3	9	15			35	25	3	3	2	5
3	9	16			33	24	3	2	1	3
3	9	17			26	16	2	4	3	6
20	721	1132	15	30.1	29	54.5	2	1	1	1
20	721	1133	15	14.1	35.1	25.5	3	3	2	5
20	723	1136	5	5.1	27.6	17.2	2	3	2	4
20	723	1137	5	4.5	25.7	17.7	2	3	2	4
27	71	120			53.3	37.4	3	3	3	6
27	71	121			51	31	2	2	2	3
27	75	125			54.4	34.9	2	4	2	5
27	75	126			31.2	22.4	3	4	2	6
27	75	127			14.9	11.8	3	4	2	6
27	78	133			33.3	23.1	2	3	2	4
27	78	134			31.2	20.3	2	2	2	3
27	78	135			22	10.8	1	3	3	4
27	78	136			18.8	15.3	3	3	3	6
27	78	137			18.9	13.5	3	3	3	6
27	78	138			16	11.4	3	3	3	6
27	78	139			18	12.1	2	2	2	3
27	78	140			18.7	7.4	1	2	2	2
27	84	149			45.9	30.2	2	3	2	4
27	84	150			29.4	25.4	4	4	3	8
27	87	153			45.8	28.5	2	3	2	4
27	87	154			39.4	20.3	2	4	3	6
27	100	179			32.7	21.2	2	3	3	5
27	100	180			30.9	23.4	3	4	3	7
27	100	181			25.8	25.8	4	3	3	7
35	811	1291	5	10.1	31	24.2	3	1	2	3
35	811	1292	5	7.8	38.3	15	1	2	1	1
35	813	1296	5	67.1	71.4	42.5	2	1	1	1
35	813	1297	5	6.9	23.9	21.1	4	4	3	8
35	814	1298	25	14	35.7	23.7	2	1	1	1
35	814	1299	25	9.5	34.2	15.3	1	1	1	0
35	814	1300	25	2.3	20.1	14	2	2	1	2
35	819	1306	15	6.9	27.5	21	3	3	2	5
35	819	1307	15	8.9	30.9	20.8	2	3	3	5
35	819	1308	15	12.7	33.4	24.6	3	3	2	5
56	149	295	5		32.5	18	2	2	2	3
56	149	296	5		25.7	21	3	3	3	6
56	149	297	5		23.7	16.5	2	4	3	6
56	150	298	5		55.4	30	2	2	1	2
56	150	299	5		25.5	17.9	3	3	2	5
56	166	320	15		38.3	23.2	2	1	1	1
56	166	321	15		26.1	20.8	3	2	2	4
56	919	1462	15	3.3	21.4	13.5	2	2	1	2
56	919	1463	15	1.8	18.4	13.6	3	3	2	5
56	922	1468	15	87.5	68.4	46.4	2	1	1	1
56	922	1469	15	21.4	40.6	31.7	3	2	1	3
56	922	1470	15	3.3	20.7	16.6	3	1	2	3
56	926	1474	5	19	37.3	29	3	3	1	4
56	926	1475	5	12.2	33.5	23.6	3	2	1	3
56	926	1476	5	2.36	17.4	14.1	3	4	3	7
56	938	1493	5	210	96	61	2	1	1	1
56	938	1494	5	20.5	41.8	27.3	2	2	3	4
56	938	1495	5	21	40.3	26.2	2	3	2	4
56	938	1496	5	4.4	21	17.2	3	3	3	6
77	1044	1675	5	23.3	39.8	31.1	3	2	3	5
77	1044	1676	5	17.8	42.3	27.2	2	2	2	3
77	1044	1677	5	11.5	31.3	25.1	3	3	2	5
77	1044	1678	5	7	27.6	21.4	3	2	3	5
77	1046	1681	15	33.5	48.9	38.4	3	1	1	2
77	1046	1682	15	19.5	39.3	28.9	3	2	1	3
84	246	439	5		26	21	3	3	3	6
84	246	440	5		16	15	4	3	3	7
97	329	561	15		65	43	2	1	2	2
97	329	562	15		48	31	2	3	2	4
97	331	566	5		43	25	2	1	2	2
97	331	567	5		32	24	3	3	1	4
97	335	571	5		48	27	2	3	3	5
97	335	572	5		23	19	3	4	3	7
97	347	586	5		16	11	2	4	3	6
97	347	587	5		14	11	3	4	3	7
97	347	588	5		24	17	3	4	3	7
112	420	673	15		42	32	3	3	2	5
112	420	674	15		25	18	3	4	3	7
112	421	675	5		44	25	2	2	1	2
112	421	676	5		24	20	3	3	3	6
112	423	679	5		28	20	3	1	1	2
112	423	680	5		28	21	3	2	2	4
112	424	681	15		50	30	2	1	1	1
112	424	682	15		21	15	3	3	3	6
112	425	683	5		61	33	2	1	2	2
112	425	684	5		23	12	2	4	3	6

## Sheet: block3_cluster
dayofseason	cluster_id	fruitbody_id	depth	weight	diam1	diam2	sphericity	lobularity	regular	shape
1	675	1047	5	19	35.8	26.4	3	3	3	9
1	675	1048	5	1	13.2	11.9	4	3	3	10
1	677	1059	15	21.5	38	31	3	3	3	9
1	677	1060	15	9.3	34	21	2	1	1	4
1	677	1061	15	2.3	20	17	3	3	2	8
20	753	1184	15	29.4	45.5	33.7	3	1	2	6
20	753	1185	15	19.8	36.3	27.9	3	3	2	8
20	760	1195	5	13.9	37.1	19.5	2	2	1	5
20	760	1196	5	8.5	25.7	17.8	2	2	2	6
20	760	1197	5	2.4	22	11.1	2	3	3	8
35	847	1337	5	3.7	22.5	13.7	2	3	2	7
35	847	1338	5	3.1	21.2	14.1	2	3	3	8
35	847	1339	5	2.1	19.9	13.4	2	4	3	9
35	849	1344	15	23.6	46.9	27.8	2	2	2	6
35	849	1345	15	3.6	20.3	17.1	3	4	3	10
35	852	1358	15	27.2	47.8	26	2	2	1	5
35	852	1359	15	9.3	29.6	21.5	3	3	3	9
35	852	1360	15	6.2	25.4	17.1	2	1	2	5
35	858	1368	5	18.7	35	29.5	3	3	3	9
35	858	1369	5	5.8	22.8	21	4	3	3	10
35	858	1370	5	8.2	27.7	24.1	4	3	3	10
35	865	1379	15	67	64	40	2	2	2	6
35	865	1380	15	39.3	55.1	34.6	2	2	1	5
35	865	1381	15	22.4	41.8	23.1	2	3	2	7
56	177	336	15		42.3	31.4	3	3	2	8
56	177	337	15		20	15.2	3	3	3	9
56	951	1515	5	38.5	50.2	36.4	3	3	2	8
56	951	1516	5	22.4	44.8	27.9	2	2	1	5
56	951	1517	5	21.3	39	31.1	3	2	3	8
56	951	1518	5	5.9	25	21	3	3	3	9
56	956	1534	15	28.8	44.3	33.7	3	2	1	6
56	956	1535	15	21.7	39.6	28.9	3	2	2	7
56	956	1536	15	14.5	33.9	25	3	3	2	8
56	956	1537	15	16.2	33.6	29	4	2	1	7
77	1080	1720	15	24.1	43.5	25.9	2	2	3	7
77	1080	1721	15	8.3	33	22.7	2	3	2	7
77	1082	1724	15	12.4	31.1	26.5	4	3	3	10
77	1082	1725	15	6.6	24.8	19.9	3	3	3	9
84	268	468	15		32	24	3	4	3	10
84	268	469	15		20	17	3	3	3	9
84	269	470	5		40	31	3	2	2	7
84	269	471	5		33	26	3	3	2	8
84	270	472	15		42	27	2	3	3	8
84	270	473	15		26	18	2	4	3	9
97	370	611	5		18	14	3	3	3	9
97	370	612	5		18	16	4	3	3	10
97	371	613	15		41	21	2	1	1	4
97	371	614	15		22	15	2	3	3	8
97	372	615	5		29	19	2	1	1	4
97	372	616	5		31	16	2	2	2	6
97	372	617	5		25	14	2	2	2	6
